# Supplementary material
Source: PubMed Central journal article supplement (PMC5461802)
Supplement: ASN.2016090974SupplementaryData.pdf [file ASN.2016090974SupplementaryData.pdf]

## Supplemental Information

### Unique Transcriptional Programs Identify Subtypes of “Acute Kidney Injury”

Katherine Xu,<sup>\*1</sup> Paul Rosenstiel,<sup>\*1</sup> Neal Paragas,<sup>2</sup> Christian Hinze,<sup>3</sup>  
Xiaobo Gao,<sup>4</sup> Max Werth,<sup>1</sup> Catherine Forster,<sup>5</sup> Rong Deng,<sup>1</sup> Efrat Bruck,<sup>1</sup> Roger W.  
Boles,<sup>1</sup> Alexandra Tornato,<sup>1</sup> Tejashree Gopal,<sup>1</sup> Madison Jones,<sup>1</sup> Justin Konig,<sup>1</sup> Jacob  
Stauber,<sup>1</sup> Vivette D’Agati,<sup>1</sup> Hediye Erdjument-Bromage,<sup>6</sup> Subodh Saggi,<sup>7</sup> Gebhard  
Wagener,<sup>1</sup> Kai M. Schmidt-Ott,<sup>3</sup> Nicholas Tatonetti,<sup>1</sup> Paul Tempst,<sup>8</sup>  
Juan A. Oliver,<sup>†1</sup> Paolo Guarnieri,<sup>†1</sup> and Jonathan Barasch<sup>†1</sup>

<sup>1</sup> Columbia University Medical Center, New York, NY 10032 <sup>2</sup> University of Washington, Seattle, WA 98195 <sup>3</sup> Max Delbrück Center for Molecular Medicine, Berlin, Germany 13125  
<sup>4</sup> Icahn School of Medicine at Mount Sinai, New York, NY 10029 <sup>5</sup> Cincinnati Children’s Hospital Medical Center, Cincinnati, OH 45229 <sup>6</sup> New York University Langone Medical Center, New York, NY 10016 <sup>7</sup> SUNY Downstate Medical Center, Brooklyn, NY 11203  
<sup>8</sup> Memorial Sloan Kettering, New York, NY 10065

\*Authors contributed equally

† Corresponding authors

†[Paolo Guarnieri](#)

Department of Systems Biology

[pg2296@columbia.edu](mailto:pg2296@columbia.edu)

+1 212 851 4767

Irving Cancer Research Center

1130 St. Nicholas Avenue

New York NY 10032

United States

†[Jonathan Barasch](#)

Department of Medicine/Nephrology

[jmb4@columbia.edu](mailto:jmb4@columbia.edu)

+1 917 671 6081

Nephrology Div 4 Stem

Department of Medicine

622 W 168<sup>th</sup> Street

New York NY 10032

United States

## Full Methods

*Clinical Samples.* Emergency Room urine samples were selected at random from our multicenter prospective cohort study<sup>1</sup>, using our published criteria for iAKI, vAKI and control. The total cohort was followed solely by sCr kinetics, and in a separate analysis, the cohort was adjudicated using strict criteria including clinical history, time to resolution of elevated sCr (vAKI<72hrs; iAKI≥7days), and rapid responses to volume challenges, aimed at identifying only “gold standard” patients. The adjudication yielded (1) Normals (no fluctuations in sCr, no history of exposure to agents that might cause iAKI such as nephrotoxins, sepsis, obstructive uropathy, rhabdomyolysis), (2) vAKI patients (≥RIFL-R and historical or clinical data suggesting decreased renal perfusion for example due to hyperglycemia, diarrhea, but no history of exposure to agents that might cause iAKI such as nephrotoxins, sepsis, obstructive uropathy, rhabdomyolysis and time limited resolution <3days with fluid therapy or diuretic withdrawal), and finally (3) iAKI patients (≥RIFL-R, with evidence of exposure to stimuli known to induce AKI, but lack of resolution for ≥168hrs). Patients in the later category were more likely to require a renal consultant and undergo dialysis. Hence the iAKI and vAKI cohorts differed by time to resolution but also by their history and severity of clinical outcome.

Patients with documented urinary tract infections and chronic kidney disease were excluded. Standard blood chemistries were collected each day for 7 days post admission as previously published<sup>1</sup>. Representative iAKI patients had acute illnesses due to sepsis and rhabdomyolysis with a 2.56 fold rise in sCr at the time of admission from the Emergency Department and prolonged azotemia ≥7days; these patients were seen by a renal consultant. Representative vAKI patients had an acute illness associated with hyperglycemia, gastroenteritis, and other etiologies which raised the sCr 2.14 fold but resolved within <72hrs, and were not visited by a renal consultant. Control

patients had acute illnesses due to cardiovascular disease and trauma and other etiologies with no rise in sCr.

*RNA-sequencing batch effect analysis.* The effect of technical variables (batch effects) were examined by inspecting PCA plots versus biological and batch surrogates<sup>2</sup>, which did not demonstrate any batch driven data structure, but rather biologically driven separation ([Supplemental Figure 5](#)). Additionally, a surrogate variable analysis was performed with the “sva” bioconductor package<sup>3,4</sup>, which did not identify any significant association with the tested covariates (RNA extraction and library preparation). Unsupervised cluster analysis was performed on log<sub>2</sub> transformed FPKM values using Spearman correlation as distance and complete linkage as similarity method. No significant differences were seen in mRNA integrity (RIN Agilent 2100 Bioanalyzer) from different samplings and all samples passed the quality controls on post sequencing analysis.

*Real-time PCR analysis.* Total RNA was isolated and first-strand cDNA was synthesized with Superscript III (Invitrogen). Real-time PCR was performed using LightCycler®96 (Roche) with a SYBR green Supermix reagent (Bio-Rad) and specific primers ([Supplementary Table 4](#)).  $\beta$ -actin was quantified as an internal control.  $\Delta\Delta C_t$  was used to calculate fold amplification of transcripts.

*Post LS-MS/MS analysis.* Database searches were carried out using Mascot version 2.5.0<sup>5</sup> with the human segment of Uniprot protein database (20, 210 sequences; European Bioinformatics Institute, Swiss Institute of Bioinformatics and Protein Information Resource). The search parameters were as follows: (i) two missed cleavage tryptic site allowed; (ii) precursor ion mass tolerance =10ppm; (iii) fragment ion mass

tolerance=0.8 Da; and variable peptide modifications were allowed for methionine oxidation, deamidation of asparagine to glutamine, protein N-terminal acetylation. If reduction and alkylation was done, carbamidomethylation of cysteine was used as a fixed modification. Decoy database search was always activated and in general, with  $p < 0.01$ , false discovery rate averaged less than 1%. Scaffold (Proteome Software Inc., Portland, OR) version 4.4.1 was used to further validate and cross-tabulate the MS/MS based peptide and protein identifications; protein and peptide probability was set at 95% with a minimum peptide requirement of one. The validity of the proteins was indicated by the spectral counts of NGAL, OPN, CLU in iAKI urine.

## Supplemental Figures

**Supplemental Figure 1.** Basic metabolic profiles of AKI models. iAKI (10min ischemia, 24hrs of reperfusion) versus vAKI (72hr volume depletion) demonstrate similar RIFLE-R levels of sCr (control: n=3; ischemia: n=6; volume depletion: n=7). Nonetheless, histopathology (H&E) demonstrates acute tubular injury particularly in the outer stripe of the outer medulla (denoted by \*pars recta (straight segment S3) of the proximal tubule) in iAKI, but no evidence of acute kidney injury in vAKI or control (Black bars=250µm). TUNEL assay demonstrated focal clusters of apoptotic cells in the cortex and OSOM of iAKI kidneys, while vAKI and control kidneys had scant apoptotic cells (White bars=100µm).

|                         | Control     | iAKI: Bilateral Ischemia (24Hr) | vAKI: Volume Depletion (72Hr) |
|-------------------------|-------------|---------------------------------|-------------------------------|
| <b>Body weight loss</b> | 0%          | 10%                             | 20%                           |
| <b>Crea (mg/dL)</b>     | 0.20 ± 0    | 0.30 ± 0.07 **                  | 0.38 ± 0.12 *                 |
| <b>BUN (mg/dL)</b>      | 17.3 ± 6.5  | 24.7 ± 10.5                     | 44.9 ± 13.7 *†                |
| <b>Na (mmol/L)</b>      | 146.3 ± 0.6 | 147 ± 6.4                       | 159.6 ± 3.5 *†                |
| <b>Hct (%PCV)</b>       | 37.7 ± 2.1  | 34.7 ± 4.1                      | 46 ± 4.3 *†                   |
| <b>Hgb (g/dL)</b>       | 12.8 ± 0.7  | 11.8 ± 1.4                      | 15.6 ± 1.5 *†                 |

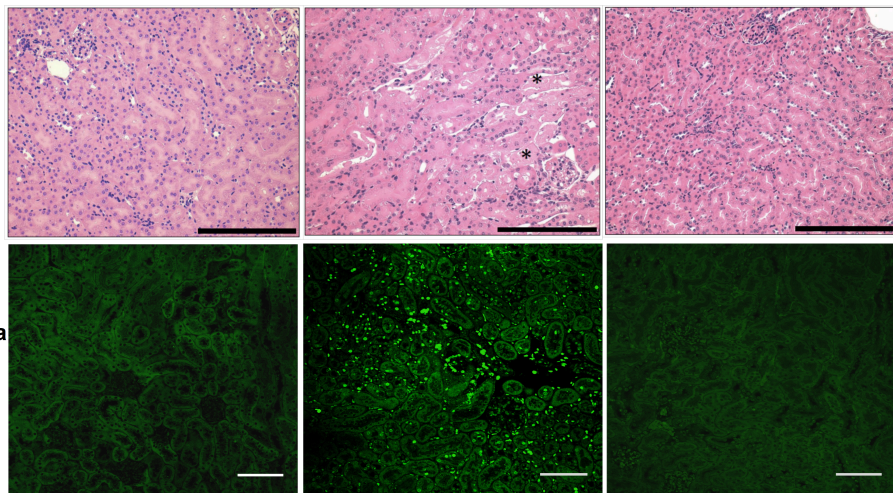

\* p<0.01 vs. Control  
 \*\* p<0.05 vs. Control  
 † p<0.01 vs. Ischemia

**Supplemental Figure 2.** Segment-specific gene expression<sup>6</sup> analysis using (A) RNA-seq and (B) RT-qPCR which confirmed the enrichment of segment specific genes from podocytes, proximal, and distal tubules<sup>6,7</sup> in the appropriate captured RNA pool. Note the segment specific enrichment or de-enrichment in each anatomic compartment compared to whole kidney extracts (n=3 for cortex, OSOM, ISOM, Whole Kidney; n=2 for Glom; \* p<0.05 compared to every other region, † p<0.05 compared to cortex). For example, OSOM was accurately isolated based on the absence of *Slc5a2*<sup>8</sup> and *Alpl*<sup>9</sup> (markers which are found predominantly in the S1 segment). Moreover, whole kidney extracts mirrored cortical genes and recapitulated prior studies<sup>10</sup>.

### A. RNA-seq

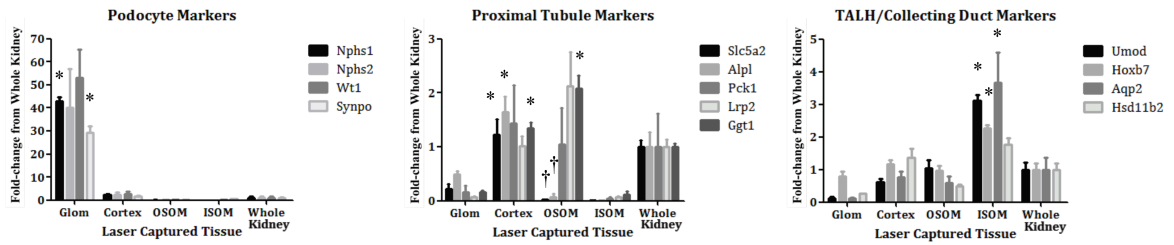

### B. RT-qPCR

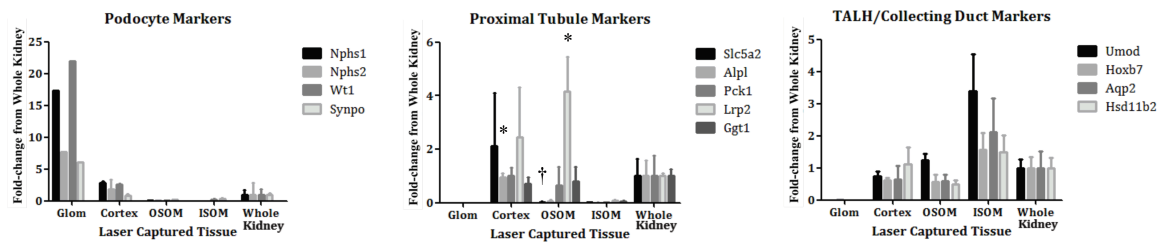

**Supplemental Figure 3.** iAKI and vAKI models demonstrated unique and regional specific transcriptional profiles in an unsupervised hierarchical clustering analysis of mRNA sequencing of glomerulus, cortex, outer stripe of outer medulla, inner stripe of outer medulla, and whole kidney. The whole transcriptome was clustered using counts, and distance is expressed as  $1 - \text{Spearman correlation } (\rho)$ . Note that genes stratified by the specific stimulus in different microanatomical regions (glomerulus and ISOM). iAKI agglomerated both the cortex and OSOM. vAKI gene set agglomerated with the control gene set in the Cortex, OSOM and ISOM. vAKI (n=5), iAKI (n=3) and control (n=3) kidneys (i.e. 50 independent samples).

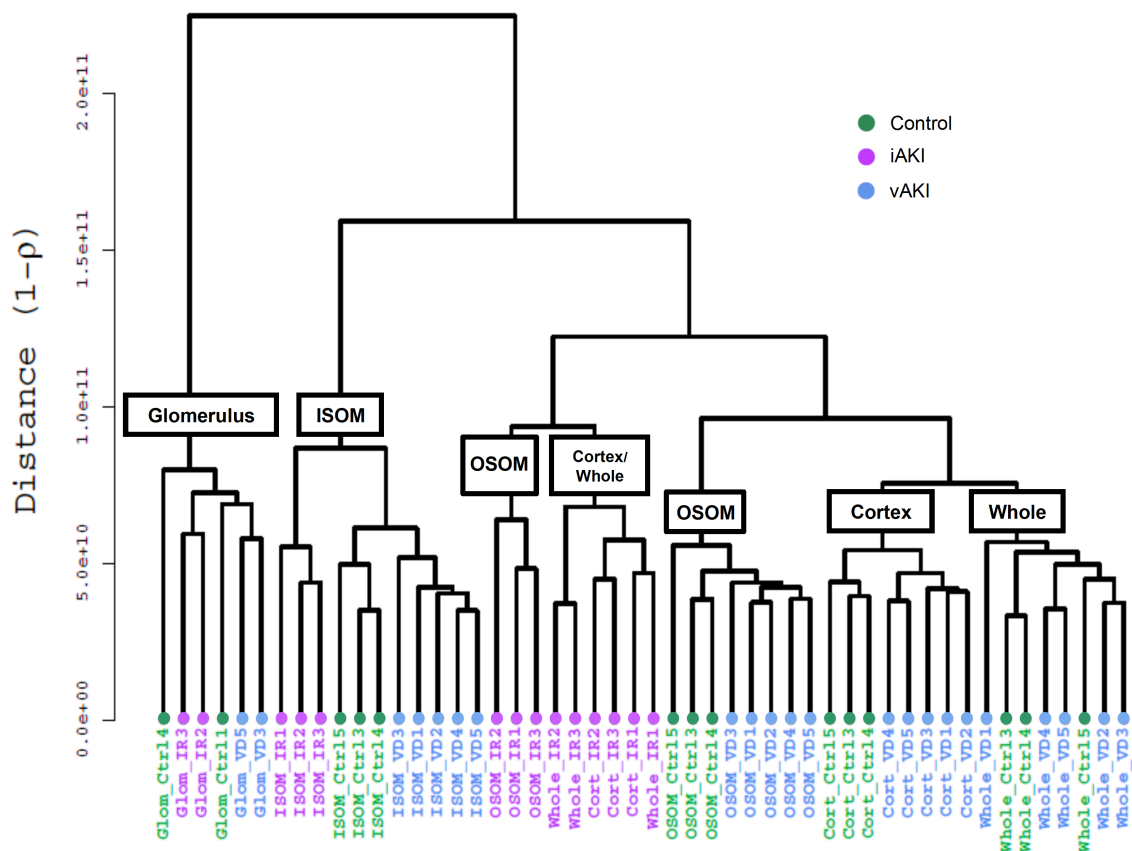

**Supplemental Figure 4.** Rehydration reverses vAKI gene expression. vAKI mice (n=5) were water/food deprived for 72 hours followed by ad-libitum access to water for 24 hours. Differentially expressed vAKI genes (*Stc1*, *Pappa2*, *Enpp2*, *Hpd*) and sCr and sNa measurements returned to baseline after resuscitation.

| n | sCr (mg/dL)   | sNa (mM)    |
|---|---------------|-------------|
| 4 | 0.20 ±0       | 146.3±0.6   |
| 5 | 0.37± 0.006 * | 159.6±3.5 * |
| 5 | 0.28±0.09     | 131.4±2.5 † |

\*p<0.05 Volume Depletion vs Control †p<0.05 Volume Depletion vs Rehydration 24Hr

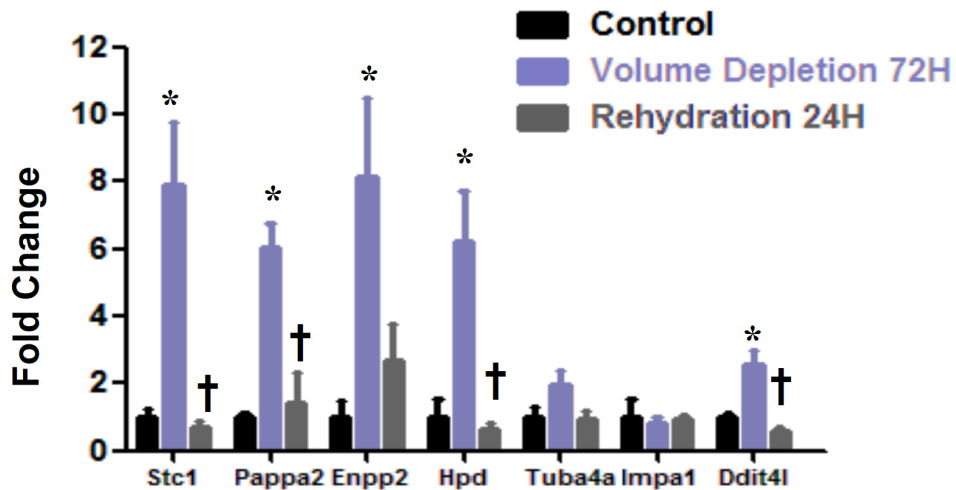

\*p<0.05 Volume Depletion vs Control †p<0.05 Volume Depletion vs Rehydration 24Hr



**Supplemental Figure 5.** Principal component analysis (PC1 vs PC2) of RNA extraction on different days from different regions of the kidney. Note that the data clustered according to kidney domain.

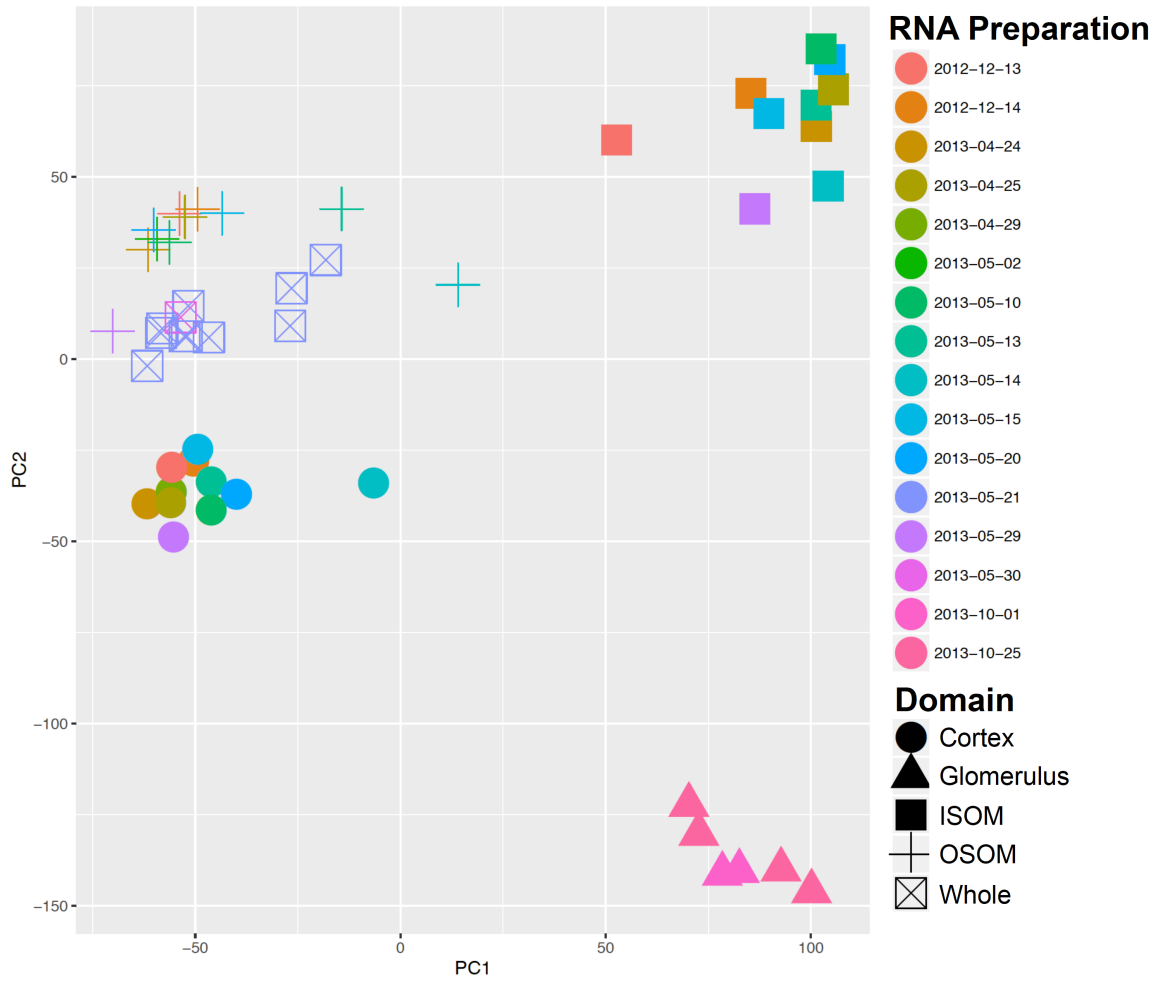

## Supplemental Table Legends

**Supplemental Table 1A.** 1158 differentially expressed iAKI genes ( $\geq 2$ -fold change,  $p < 10^{-5}$ ) were not significantly expressed in vAKI. Table shows fold change from control; genes were ranked by q-value. Only FPKM values with significant fold change ( $q < 0.01$ ) from control are reported. NS: non-significant. Expression pattern displays relative FPKM expression values, row normalized to the highest FPKM across all regions and conditions.

**Supplemental Table 1B.** 103 differentially expressed vAKI genes ( $\geq 2$ -fold change,  $p < 10^{-5}$ ) were not significantly expressed in iAKI. Table shows fold change from control genes were ranked by q-value. Only FPKM values with significant fold change ( $q < 0.01$ ) from control are reported. NS: non-significant. Expression pattern displays relative FPKM expression values, row normalized to the highest FPKM across all regions and conditions.

**Supplemental Table 2.** Published iAKI biomarkers are specific to the iAKI model<sup>11</sup>. They are not expressed in the vAKI model. The region with most significant fold change was reported for each condition. Only FPKM values with significant fold change ( $q < 0.01$ ) from control are reported. The expression pattern displays relative FPKM expression values, row normalized to the highest FPKM across regions and conditions. NS: non-significant.

**Supplemental Table 3A.** 267 secreted proteins induced by iAKI ( $\geq 1$ -fold change,  $p < 10^{-5}$ ) annotated in the Max Planck Unified Proteome Database or the Secretome database and expressed at FPKM levels  $> 1$ . Table shows fold change from control. Genes were ranked by q-value. Only FPKM values with significant fold change ( $q < 0.01$ )

from control are reported. NS: non-significant. Expression pattern displays relative FPKM expression values, row normalized to the highest FPKM across all regions and conditions.

**Supplemental Table 3B.** 30 secreted proteins induced by vAKI ( $\geq 1$ -fold change,  $p < 10^{-5}$ ) annotated in the Max Planck Unified Proteome Database or the Secretome database and expressed at FPKM levels  $> 1$ . Table shows fold change from control. Genes were ranked by q-value. Only FPKM values with significant fold change ( $q < 0.01$ ) from control are reported. NS: non-significant. Expression pattern displays relative FPKM expression values, row normalized to the highest FPKM across all regions and conditions.

**Supplemental Table 4.** qPCR primer sequences of nephron segment specific genes and of iAKI and vAKI specific genes.

## Supplemental References

1. Nickolas TL, O'Rourke MJ, Yang J, Sise ME, Canetta PA, Barasch N, Buchen C, Khan F, Mori K, Giglio J, Devarajan P, Barasch J: Sensitivity and specificity of a single emergency department measurement of urinary neutrophil gelatinase-associated lipocalin for diagnosing acute kidney injury. *Ann. Intern. Med.* 148: 810–819, 2008
2. Leek JT, Scharpf RB, Bravo HC, Simcha D, Langmead B, Johnson WE, Geman D, Baggerly K, Irizarry RA: Tackling the widespread and critical impact of batch effects in high-throughput data. *Nat. Rev. Genet.* 11: 733–9, 2010
3. Leek JT, Johnson WE, Parker HS, Fertig EJ JA and SJ: SVA: Surrogate Variable Analysis. R package.
4. Leek JT, Storey JD: Capturing heterogeneity in gene expression studies by surrogate variable analysis. *PLoS Genet.* 3: 1724–35, 2007
5. Perkins DN, Pappin DJ, Creasy DM, Cottrell JS: Probability-based protein identification by searching sequence databases using mass spectrometry data. *Electrophoresis* 20: 3551–67, 1999
6. Igarashi P: Kidney-specific gene targeting. *J. Am. Soc. Nephrol.* 15: 2237–9, 2004
7. Dworniczak B, Skryabin B, Tchinda J, Heuck S, Seesing F-J, Metzger D, Chambon P, Horst J, Pennekamp P: Inducible Cre/loxP recombination in the mouse proximal tubule. *Nephron. Exp. Nephrol.* 106: e11–20, 2007
8. Mather A, Pollock C: Glucose handling by the kidney. *Kidney Int. Suppl.* 79: S1–6, 2011
9. Brière N, Martel M, Plante G, Petitclerc C: Heterogeneous distribution of alkaline phosphatase and gamma-glutamyl transpeptidase in the mouse nephron. *Acta Histochem.* 74: 103–8, 1984
10. Yuen PST, Jo S-K, Holly MK, Hu X, Star RA: Ischemic and nephrotoxic acute renal failure are distinguished by their broad transcriptomic responses. *Physiol. Genomics* 25: 375–86, 2006
11. Vanmassenhove J, Vanholder R, Nagler E, Van Biesen W: Urinary and serum biomarkers for the diagnosis of acute kidney injury: an in-depth review of the literature. *Nephrol. Dial. Transplant* 28: 254–73, 2013



|               |      |         |          |    |  |
|---------------|------|---------|----------|----|--|
| Carhsp1       | OSOM | 2.45    | 2.74E-15 | NS |  |
| Cd2ap         | OSOM | 3.00    | 3.64E-15 | NS |  |
| Finc          | OSOM | 38.39   | 4.38E-15 | NS |  |
| Rtn4          | OSOM | 4.44    | 4.69E-15 | NS |  |
| Lrrc59        | OSOM | 2.61    | 5.99E-15 | NS |  |
| F3            | OSOM | 8.34    | 6.52E-15 | NS |  |
| Tnfrsf12a     | OSOM | 16.58   | 7.07E-15 | NS |  |
| Tpm3          | OSOM | 3.43    | 7.54E-15 | NS |  |
| Saa2          | OSOM | 597.21  | 7.84E-15 | NS |  |
| Cirh1a        | OSOM | 2.45    | 7.98E-15 | NS |  |
| Vat1          | OSOM | 4.41    | 8.67E-15 | NS |  |
| Trmt61a       | OSOM | 4.25    | 9.80E-15 | NS |  |
| Rap2b         | OSOM | 6.07    | 9.91E-15 | NS |  |
| Bzw2          | OSOM | 3.23    | 1.41E-14 | NS |  |
| Sult2b1       | OSOM | 6.01    | 1.86E-14 | NS |  |
| Phgdh         | OSOM | 6.02    | 2.01E-14 | NS |  |
| Cd24a         | OSOM | 5.11    | 2.22E-14 | NS |  |
| Hn1           | OSOM | 4.24    | 2.40E-14 | NS |  |
| Rhou          | OSOM | 8.41    | 2.63E-14 | NS |  |
| Ranbp1        | OSOM | 2.62    | 2.84E-14 | NS |  |
| Setd8         | OSOM | 2.17    | 2.92E-14 | NS |  |
| Tnfrsf23      | OSOM | 11.29   | 3.14E-14 | NS |  |
| Fga           | OSOM | 30.54   | 3.27E-14 | NS |  |
| Rcan1         | OSOM | 6.50    | 3.38E-14 | NS |  |
| 2610029G23Rik | OSOM | 2.35    | 3.65E-14 | NS |  |
| Slc39a10      | OSOM | 2.89    | 4.41E-14 | NS |  |
| Bspry         | OSOM | 2.91    | 6.95E-14 | NS |  |
| Kctd5         | OSOM | 2.82    | 7.87E-14 | NS |  |
| Ept1          | OSOM | 2.48    | 1.12E-13 | NS |  |
| Galnt3        | OSOM | 2.55    | 1.13E-13 | NS |  |
| Olfm4         | ISOM | 8.66    | 1.18E-13 | NS |  |
| Trim47        | OSOM | 4.10    | 1.21E-13 | NS |  |
| Relb          | OSOM | 5.08    | 1.22E-13 | NS |  |
| Pwp1          | OSOM | 2.41    | 1.23E-13 | NS |  |
| Lamc2         | OSOM | 6.08    | 1.29E-13 | NS |  |
| Sphk1         | OSOM | 5.15    | 1.42E-13 | NS |  |
| Hspb1         | OSOM | 6.53    | 1.56E-13 | NS |  |
| Cldn7         | OSOM | 3.58    | 1.6E-13  | NS |  |
| Tpm4          | OSOM | 3.07    | 1.8E-13  | NS |  |
| Krt20         | OSOM | 1643.38 | 1.99E-13 | NS |  |
| Tnc           | OSOM | 27.90   | 2.06E-13 | NS |  |
| Hsd17b12      | OSOM | 2.08    | 2.29E-13 | NS |  |
| Pinx1         | OSOM | 3.23    | 2.34E-13 | NS |  |
| Akr1b8        | OSOM | 35.13   | 2.63E-13 | NS |  |
| Xbp1          | OSOM | 3.32    | 2.98E-13 | NS |  |
| Mad2l2        | OSOM | 2.86    | 3.45E-13 | NS |  |
| Socs3         | OSOM | 22.44   | 3.45E-13 | NS |  |
| Sae1          | OSOM | 2.06    | 3.77E-13 | NS |  |
| Agpat9        | OSOM | 3.76    | 3.78E-13 | NS |  |
| Efh2          | OSOM | 4.33    | 4.15E-13 | NS |  |
| Eif4ebp1      | OSOM | 4.63    | 4.4E-13  | NS |  |
| Cldn4         | OSOM | 17.72   | 4.41E-13 | NS |  |
| Osmr          | OSOM | 5.55    | 4.43E-13 | NS |  |
| Fam83a        | OSOM | 1907.38 | 4.48E-13 | NS |  |
| Pprc1         | OSOM | 3.77    | 4.84E-13 | NS |  |
| Wdr77         | OSOM | 2.34    | 5.21E-13 | NS |  |
| Psm11         | OSOM | 2.47    | 5.46E-13 | NS |  |
| Ifrd1         | OSOM | 3.76    | 6.4E-13  | NS |  |
| Prmt1         | OSOM | 2.23    | 6.6E-13  | NS |  |
| Tnfrsf1b      | OSOM | 3.92    | 6.93E-13 | NS |  |
| Susd1         | OSOM | 3.93    | 7.1E-13  | NS |  |
| Itga3         | OSOM | 4.14    | 7.19E-13 | NS |  |
| Sbno2         | OSOM | 6.03    | 8.05E-13 | NS |  |
| Stat3         | OSOM | 3.43    | 8.14E-13 | NS |  |
| Fam49b        | OSOM | 2.23    | 9.54E-13 | NS |  |
| Tsc22d1       | ISOM | 8.12    | 1.03E-12 | NS |  |
| Tmbim1        | OSOM | 2.21    | 1.3E-12  | NS |  |
| Nup62         | OSOM | 2.09    | 1.31E-12 | NS |  |
| Rel1          | OSOM | 3.75    | 1.41E-12 | NS |  |
| Alcam         | OSOM | 2.74    | 1.77E-12 | NS |  |
| Lig1          | OSOM | 4.37    | 1.88E-12 | NS |  |
| Gadd45a       | OSOM | 5.90    | 1.92E-12 | NS |  |
| Fgg           | OSOM | 108.21  | 1.95E-12 | NS |  |
| Cpne8         | OSOM | 3.52    | 2E-12    | NS |  |
| Smpd13b       | OSOM | 13.27   | 2.25E-12 | NS |  |
| Golm1         | OSOM | 4.81    | 2.31E-12 | NS |  |
| Rrp8          | OSOM | 2.11    | 2.35E-12 | NS |  |
| Kctd1         | OSOM | 6.25    | 2.47E-12 | NS |  |
| Mettl21a      | OSOM | 2.50    | 2.5E-12  | NS |  |
| Tmem173       | OSOM | 7.74    | 2.5E-12  | NS |  |
| Maff          | OSOM | 7.51    | 2.5E-12  | NS |  |
| Plscr1        | OSOM | 3.06    | 2.58E-12 | NS |  |
| Tmem171       | OSOM | 3.67    | 2.65E-12 | NS |  |
| C3            | OSOM | 13.62   | 2.68E-12 | NS |  |

|               |        |        |          |    |  |
|---------------|--------|--------|----------|----|--|
| Pcna          | OSOM   | 2.82   | 2.88E-12 | NS |  |
| Fen1          | OSOM   | 3.68   | 2.89E-12 | NS |  |
| A130040M12Rik | OSOM   | 28.06  | 2.89E-12 | NS |  |
| Rad18         | OSOM   | 6.48   | 3.04E-12 | NS |  |
| Eif6          | OSOM   | 3.25   | 3.34E-12 | NS |  |
| Ptpn12        | OSOM   | 2.53   | 3.43E-12 | NS |  |
| Kcnnh1        | ISOM   | 16.14  | 3.48E-12 | NS |  |
| Hsd3b7        | OSOM   | 2.31   | 3.63E-12 | NS |  |
| Npl           | OSOM   | 4.61   | 3.68E-12 | NS |  |
| Gmids         | ISOM   | 2.40   | 3.8E-12  | NS |  |
| Serpina3n     | Cortex | 24.04  | 3.81E-12 | NS |  |
| Msn           | OSOM   | 3.83   | 4.54E-12 | NS |  |
| Btg1          | OSOM   | 2.72   | 4.58E-12 | NS |  |
| Mboat1        | OSOM   | 6.21   | 5.17E-12 | NS |  |
| Ifngr2        | OSOM   | 2.75   | 5.59E-12 | NS |  |
| Nupr1         | OSOM   | 6.53   | 5.63E-12 | NS |  |
| Dnmt1         | OSOM   | 3.00   | 6.2E-12  | NS |  |
| Krt8          | OSOM   | 4.00   | 6.21E-12 | NS |  |
| Pgm1          | OSOM   | 3.46   | 6.69E-12 | NS |  |
| Tnfrsf2       | OSOM   | 2.82   | 7.62E-12 | NS |  |
| Wdr72         | OSOM   | 4.46   | 8.03E-12 | NS |  |
| Gnl3          | OSOM   | 2.51   | 8.13E-12 | NS |  |
| Cicf1         | OSOM   | 10.74  | 8.38E-12 | NS |  |
| Rcc2          | OSOM   | 2.70   | 8.86E-12 | NS |  |
| Itgam         | OSOM   | 8.60   | 9.05E-12 | NS |  |
| Lsr           | OSOM   | 2.25   | 9.24E-12 | NS |  |
| Dusp5         | OSOM   | 53.86  | 9.66E-12 | NS |  |
| B4galnt6      | OSOM   | 2.61   | 9.98E-12 | NS |  |
| Vopp1         | OSOM   | 3.02   | 1.07E-11 | NS |  |
| G6pdx         | Cortex | 2.59   | 1.14E-11 | NS |  |
| B4galnt1      | OSOM   | 3.65   | 1.18E-11 | NS |  |
| Mcm2          | OSOM   | 4.56   | 1.22E-11 | NS |  |
| Gm6682        | OSOM   | 5.65   | 1.22E-11 | NS |  |
| Ctlu          | OSOM   | 32.67  | 1.24E-11 | NS |  |
| Xdh           | OSOM   | 4.79   | 1.25E-11 | NS |  |
| Nrg1          | OSOM   | 10.45  | 1.3E-11  | NS |  |
| Sntb2         | OSOM   | 3.29   | 1.38E-11 | NS |  |
| Gpm6b         | OSOM   | 3.09   | 1.45E-11 | NS |  |
| 5830416P10Rik | OSOM   | 45.80  | 1.52E-11 | NS |  |
| Slc7a5        | OSOM   | 9.54   | 1.57E-11 | NS |  |
| Tubb6         | OSOM   | 4.72   | 1.6E-11  | NS |  |
| Cxcl2         | Cortex | 426.35 | 1.69E-11 | NS |  |
| Dnajc2        | OSOM   | 2.15   | 1.7E-11  | NS |  |
| Mettl1        | ISOM   | 3.89   | 1.72E-11 | NS |  |
| Wars          | OSOM   | 2.03   | 1.76E-11 | NS |  |
| Akap2         | OSOM   | 3.35   | 1.82E-11 | NS |  |
| Adm2          | ISOM   | 38.36  | 1.85E-11 | NS |  |
| Emp2          | OSOM   | 4.69   | 2.01E-11 | NS |  |
| Mall          | OSOM   | 14.90  | 2.13E-11 | NS |  |
| Ili1          | OSOM   | 256.12 | 2.22E-11 | NS |  |
| Tgfb1         | OSOM   | 3.31   | 2.3E-11  | NS |  |
| Myc           | OSOM   | 14.19  | 2.3E-11  | NS |  |
| Enc1          | OSOM   | 5.63   | 2.31E-11 | NS |  |
| Saa1          | OSOM   | 726.38 | 2.71E-11 | NS |  |
| Sema3c        | Cortex | 3.26   | 2.74E-11 | NS |  |
| Ppm1j         | OSOM   | 16.42  | 2.86E-11 | NS |  |
| Plin2         | Cortex | 7.24   | 3.03E-11 | NS |  |
| Epha2         | OSOM   | 5.99   | 3.12E-11 | NS |  |
| Hells         | OSOM   | 14.94  | 3.13E-11 | NS |  |
| Tmsb10        | OSOM   | 5.64   | 3.23E-11 | NS |  |
| Havcr1        | OSOM   | 536.63 | 3.54E-11 | NS |  |
| Ddx39         | OSOM   | 2.23   | 3.56E-11 | NS |  |
| Cenpt         | OSOM   | 4.21   | 3.58E-11 | NS |  |
| Gsr           | ISOM   | 2.48   | 3.63E-11 | NS |  |
| Ctps          | Cortex | 3.66   | 3.68E-11 | NS |  |
| Slc34a2       | Cortex | 16.76  | 3.85E-11 | NS |  |
| Timp1         | OSOM   | 123.42 | 3.87E-11 | NS |  |
| Fxyd5         | OSOM   | 3.29   | 4.27E-11 | NS |  |
| Rhoc          | OSOM   | 3.33   | 4.45E-11 | NS |  |
| Uhrf1         | OSOM   | 17.43  | 4.64E-11 | NS |  |
| Serinc2       | ISOM   | 2.85   | 4.68E-11 | NS |  |
| Sprr1a        | OSOM   | 49.09  | 4.69E-11 | NS |  |
| Rangap1       | ISOM   | 2.18   | 4.72E-11 | NS |  |
| Rock2         | OSOM   | 2.29   | 4.92E-11 | NS |  |
| Tnfrsf10b     | OSOM   | 5.00   | 5.01E-11 | NS |  |
| Hbegf         | OSOM   | 6.80   | 5.09E-11 | NS |  |
| Cad           | OSOM   | 3.34   | 5.37E-11 | NS |  |
| Runx1         | OSOM   | 13.98  | 5.63E-11 | NS |  |
| Lrrfip1       | OSOM   | 2.27   | 5.73E-11 | NS |  |
| Klf16         | OSOM   | 2.30   | 5.94E-11 | NS |  |
| Mcm4          | OSOM   | 4.24   | 5.97E-11 | NS |  |
| Chmp4c        | OSOM   | 2.91   | 6.13E-11 | NS |  |
| Mybbp1a       | OSOM   | 2.73   | 6.27E-11 | NS |  |
| Trib3         | OSOM   | 15.81  | 6.33E-11 | NS |  |

|               |        |        |          |    |  |
|---------------|--------|--------|----------|----|--|
| Hsp90aa1      | OSOM   | 2.64   | 6.71E-11 | NS |  |
| Rdh12         | OSOM   | 5.94   | 7.23E-11 | NS |  |
| Lmnb2         | Cortex | 2.08   | 7.86E-11 | NS |  |
| Asns          | Cortex | 5.58   | 8.34E-11 | NS |  |
| Rpa2          | OSOM   | 3.19   | 9.03E-11 | NS |  |
| Praf2         | OSOM   | 2.63   | 9.93E-11 | NS |  |
| Calcr         | OSOM   | 469.11 | 1E-10    | NS |  |
| Ppp1r14b      | OSOM   | 3.96   | 1.02E-10 | NS |  |
| Ckif          | OSOM   | 4.21   | 1.03E-10 | NS |  |
| Mical2        | OSOM   | 4.42   | 1.06E-10 | NS |  |
| Nes           | OSOM   | 3.87   | 1.07E-10 | NS |  |
| Ppp1r13l      | OSOM   | 3.55   | 1.07E-10 | NS |  |
| Cpe           | OSOM   | 3.70   | 1.07E-10 | NS |  |
| Plod3         | OSOM   | 2.30   | 1.12E-10 | NS |  |
| Sowahc        | OSOM   | 2.46   | 1.32E-10 | NS |  |
| Mcm3          | OSOM   | 7.54   | 1.33E-10 | NS |  |
| Adam8         | OSOM   | 34.13  | 1.35E-10 | NS |  |
| Nme1          | ISOM   | 2.26   | 1.35E-10 | NS |  |
| 8430410A17Rik | OSOM   | 2.26   | 1.39E-10 | NS |  |
| Tacstd2       | OSOM   | 4.26   | 1.53E-10 | NS |  |
| Homer3        | OSOM   | 3.10   | 1.54E-10 | NS |  |
| Ptpn2         | OSOM   | 2.18   | 1.64E-10 | NS |  |
| Wdr43         | OSOM   | 2.18   | 1.73E-10 | NS |  |
| Rnf39         | OSOM   | 16.89  | 1.75E-10 | NS |  |
| Nbl1          | OSOM   | 3.08   | 1.77E-10 | NS |  |
| Morf4l2       | OSOM   | 2.29   | 1.91E-10 | NS |  |
| Noc4l         | OSOM   | 2.40   | 1.95E-10 | NS |  |
| Ran           | OSOM   | 2.39   | 1.98E-10 | NS |  |
| Fam82a1       | OSOM   | 3.44   | 2.01E-10 | NS |  |
| Mcm5          | OSOM   | 8.09   | 2.05E-10 | NS |  |
| Prrg4         | Cortex | 8.33   | 2.25E-10 | NS |  |
| Ddx21         | OSOM   | 2.72   | 2.31E-10 | NS |  |
| Aen           | ISOM   | 2.72   | 2.43E-10 | NS |  |
| Camk2n2       | OSOM   | 4.98   | 2.43E-10 | NS |  |
| Sprr2g        | Cortex | 411.58 | 2.43E-10 | NS |  |
| Fam174b       | OSOM   | 2.83   | 2.49E-10 | NS |  |
| Fam124a       | OSOM   | 3.66   | 2.61E-10 | NS |  |
| Slc7a6        | OSOM   | 2.84   | 2.64E-10 | NS |  |
| Slc39a1       | OSOM   | 2.23   | 2.65E-10 | NS |  |
| Heatr5a       | OSOM   | 2.59   | 2.72E-10 | NS |  |
| Mast4         | OSOM   | 3.66   | 2.76E-10 | NS |  |
| Ier5          | OSOM   | 3.19   | 2.77E-10 | NS |  |
| 9930013L23Rik | Cortex | 20.49  | 2.82E-10 | NS |  |
| Plekhb2       | OSOM   | 2.52   | 2.84E-10 | NS |  |
| Mical1        | OSOM   | 2.19   | 2.98E-10 | NS |  |
| Pdpn          | OSOM   | 3.76   | 3.24E-10 | NS |  |
| Utp18         | OSOM   | 2.08   | 3.28E-10 | NS |  |
| Pgd           | Cortex | 2.72   | 3.36E-10 | NS |  |
| Mre11a        | OSOM   | 2.45   | 3.43E-10 | NS |  |
| Rdh10         | OSOM   | 5.59   | 3.67E-10 | NS |  |
| Ipo4          | OSOM   | 2.33   | 3.69E-10 | NS |  |
| Ssbp4         | OSOM   | 2.83   | 4.07E-10 | NS |  |
| Cast          | OSOM   | 2.42   | 4.1E-10  | NS |  |
| Frzb          | Cortex | 4.47   | 4.25E-10 | NS |  |
| Vmp1          | ISOM   | 2.95   | 4.61E-10 | NS |  |
| Aldh1a7       | OSOM   | 5.68   | 4.66E-10 | NS |  |
| Tars          | OSOM   | 2.56   | 4.68E-10 | NS |  |
| Parm1         | OSOM   | 6.49   | 5.05E-10 | NS |  |
| Zfp52         | OSOM   | 3.01   | 5.15E-10 | NS |  |
| Gtf2f2        | OSOM   | 2.07   | 5.27E-10 | NS |  |
| Cd44          | OSOM   | 8.86   | 5.34E-10 | NS |  |
| Spns2         | OSOM   | 4.25   | 5.48E-10 | NS |  |
| Maoa          | Cortex | 2.73   | 5.7E-10  | NS |  |
| Ppfibp1       | OSOM   | 2.27   | 5.74E-10 | NS |  |
| Stap2         | OSOM   | 2.62   | 6.04E-10 | NS |  |
| Mcm7          | OSOM   | 3.12   | 6.93E-10 | NS |  |
| Gar1          | OSOM   | 3.30   | 7.31E-10 | NS |  |
| Pgs1          | OSOM   | 2.22   | 7.65E-10 | NS |  |
| Csf1          | OSOM   | 3.73   | 7.77E-10 | NS |  |
| Pcdh8         | OSOM   | 303.13 | 7.88E-10 | NS |  |
| Bcmo1         | OSOM   | 16.02  | 7.92E-10 | NS |  |
| Ili1b         | OSOM   | 13.35  | 7.95E-10 | NS |  |
| Irgb4         | OSOM   | 5.46   | 8.62E-10 | NS |  |
| Fbl           | OSOM   | 2.78   | 9.02E-10 | NS |  |
| S100a9        | OSOM   | 157.39 | 9.26E-10 | NS |  |
| Pthr1         | OSOM   | 5.98   | 9.75E-10 | NS |  |
| Sdad1         | OSOM   | 2.27   | 9.89E-10 | NS |  |
| Prmt7         | OSOM   | 2.21   | 9.98E-10 | NS |  |
| Ets2          | OSOM   | 2.11   | 1.05E-09 | NS |  |
| Liph          | OSOM   | 6.30   | 1.07E-09 | NS |  |
| E2f4          | OSOM   | 2.19   | 1.07E-09 | NS |  |
| Alyref        | OSOM   | 2.09   | 1.08E-09 | NS |  |
| Cadps2        | OSOM   | 3.17   | 1.1E-09  | NS |  |
| Lrfn4         | OSOM   | 3.77   | 1.12E-09 | NS |  |



|               |        |         |          |    |  |
|---------------|--------|---------|----------|----|--|
| Hgsnat        | OSOM   | 2.16    | 1.14E-09 | NS |  |
| Areg          | OSOM   | 838.10  | 1.14E-09 | NS |  |
| Gins2         | OSOM   | 6.45    | 1.19E-09 | NS |  |
| BC021614      | OSOM   | 38.87   | 1.31E-09 | NS |  |
| Hesx1         | OSOM   | 18.42   | 1.32E-09 | NS |  |
| Cpox          | OSOM   | 2.70    | 1.32E-09 | NS |  |
| Mlki          | OSOM   | 7.07    | 1.33E-09 | NS |  |
| Eif1a         | OSOM   | 2.31    | 1.34E-09 | NS |  |
| Fosl2         | OSOM   | 5.23    | 1.35E-09 | NS |  |
| Krt18         | OSOM   | 5.88    | 1.36E-09 | NS |  |
| Cstb          | OSOM   | 2.45    | 1.39E-09 | NS |  |
| Slc12a4       | OSOM   | 2.37    | 1.39E-09 | NS |  |
| Bysl          | OSOM   | 2.34    | 1.41E-09 | NS |  |
| Fosl1         | OSOM   | 339.01  | 1.42E-09 | NS |  |
| Fermt2        | OSOM   | 2.17    | 1.45E-09 | NS |  |
| Il1rn         | OSOM   | 145.76  | 1.46E-09 | NS |  |
| Lrrc32        | OSOM   | 3.39    | 1.55E-09 | NS |  |
| Arhgdig       | ISOM   | 5.75    | 1.57E-09 | NS |  |
| Actg1         | OSOM   | 4.14    | 1.58E-09 | NS |  |
| Trpv6         | ISOM   | 8.86    | 1.68E-09 | NS |  |
| Phlda1        | OSOM   | 6.03    | 1.68E-09 | NS |  |
| Lrp8          | ISOM   | 8.06    | 1.72E-09 | NS |  |
| Nrcam         | OSOM   | 6.78    | 1.73E-09 | NS |  |
| Gm5088        | OSOM   | 2.36    | 1.76E-09 | NS |  |
| C77080        | OSOM   | 2.14    | 1.84E-09 | NS |  |
| Cdt1          | OSOM   | 5.80    | 2E-09    | NS |  |
| Gda           | OSOM   | 4.29    | 2.05E-09 | NS |  |
| Tgfb1         | OSOM   | 4.14    | 2.07E-09 | NS |  |
| Lpcat4        | OSOM   | 2.65    | 2.08E-09 | NS |  |
| Fndc4         | OSOM   | 4.15    | 2.08E-09 | NS |  |
| Lif           | OSOM   | 89.14   | 2.1E-09  | NS |  |
| Rbm38         | OSOM   | 3.32    | 2.11E-09 | NS |  |
| 1110007C09Rik | OSOM   | 2.27    | 2.14E-09 | NS |  |
| Tgfb2         | OSOM   | 2.53    | 2.23E-09 | NS |  |
| Cpne7         | OSOM   | 6.45    | 2.34E-09 | NS |  |
| Nmt2          | OSOM   | 2.52    | 2.34E-09 | NS |  |
| 3300005D01Rik | OSOM   | 253.23  | 2.36E-09 | NS |  |
| 1810055G02Rik | OSOM   | 2.46    | 2.53E-09 | NS |  |
| Cdsn          | OSOM   | 11.91   | 2.53E-09 | NS |  |
| Pwp2          | OSOM   | 2.38    | 2.58E-09 | NS |  |
| Pogk          | OSOM   | 2.19    | 2.59E-09 | NS |  |
| Ywhag         | OSOM   | 2.35    | 2.59E-09 | NS |  |
| Slc4a11       | OSOM   | 3.41    | 2.66E-09 | NS |  |
| Serpine1      | OSOM   | 20.06   | 2.69E-09 | NS |  |
| Dysf          | OSOM   | 2.66    | 2.69E-09 | NS |  |
| Csda          | OSOM   | 2.56    | 2.71E-09 | NS |  |
| Etv4          | OSOM   | 68.56   | 2.79E-09 | NS |  |
| Rrp1b         | OSOM   | 2.73    | 2.83E-09 | NS |  |
| Fgb           | OSOM   | 1296.00 | 2.85E-09 | NS |  |
| Ercc1         | OSOM   | 2.91    | 2.85E-09 | NS |  |
| Gpr110        | OSOM   | 248.94  | 3.11E-09 | NS |  |
| Grwd1         | OSOM   | 2.62    | 3.13E-09 | NS |  |
| Dusp8         | OSOM   | 5.89    | 3.24E-09 | NS |  |
| Syt12         | OSOM   | 8.67    | 3.31E-09 | NS |  |
| Flot1         | Cortex | 2.86    | 3.39E-09 | NS |  |
| Impdh1        | OSOM   | 2.65    | 3.43E-09 | NS |  |
| Mvp           | OSOM   | 3.26    | 3.73E-09 | NS |  |
| Fam203a       | OSOM   | 2.51    | 3.87E-09 | NS |  |
| Serpine2      | OSOM   | 2.22    | 3.91E-09 | NS |  |
| Chka          | OSOM   | 2.37    | 4.17E-09 | NS |  |
| Dspp          | OSOM   | 173.09  | 4.22E-09 | NS |  |
| Heatr1        | OSOM   | 2.36    | 4.28E-09 | NS |  |
| Wdr1          | OSOM   | 2.28    | 4.49E-09 | NS |  |
| Glipr2        | OSOM   | 12.20   | 4.55E-09 | NS |  |
| Btg2          | OSOM   | 8.13    | 4.6E-09  | NS |  |
| Pcsk9         | OSOM   | 9.39    | 4.6E-09  | NS |  |
| Abpb          | OSOM   | 16.48   | 4.71E-09 | NS |  |
| Orc2          | OSOM   | 2.01    | 4.72E-09 | NS |  |
| Dkc1          | OSOM   | 2.34    | 4.82E-09 | NS |  |
| Sdc1          | ISOM   | 4.41    | 4.97E-09 | NS |  |
| Nfkbiz        | OSOM   | 5.13    | 5.1E-09  | NS |  |
| Upp1          | OSOM   | 2.45    | 5.12E-09 | NS |  |
| Emp1          | OSOM   | 3.04    | 5.19E-09 | NS |  |
| Cep170        | OSOM   | 2.88    | 5.4E-09  | NS |  |
| Ccdc164       | Glom   | 226.72  | 5.43E-09 | NS |  |
| Tnfrsf1a      | Cortex | 2.33    | 5.48E-09 | NS |  |
| Pa2g4         | OSOM   | 2.08    | 5.6E-09  | NS |  |
| Tmod3         | OSOM   | 2.10    | 5.74E-09 | NS |  |
| Tmem184b      | OSOM   | 2.05    | 5.79E-09 | NS |  |
| Mid1          | OSOM   | 3.79    | 5.79E-09 | NS |  |
| Pdlim7        | OSOM   | 4.64    | 5.92E-09 | NS |  |
| Isg20         | OSOM   | 3.94    | 6.1E-09  | NS |  |
| Foxs1         | OSOM   | 7.76    | 6.24E-09 | NS |  |
| Cdh3          | OSOM   | 4.58    | 6.28E-09 | NS |  |

|               |        |        |          |    |
|---------------|--------|--------|----------|----|
| Cdk6          | OSOM   | 4.60   | 6.37E-09 | NS |
| Rps6ka3       | OSOM   | 3.04   | 6.51E-09 | NS |
| Zfand2a       | OSOM   | 2.37   | 6.53E-09 | NS |
| Arid5a        | OSOM   | 6.67   | 6.57E-09 | NS |
| S100a6        | OSOM   | 7.11   | 6.76E-09 | NS |
| Rnps1         | OSOM   | 2.19   | 6.82E-09 | NS |
| 220002D01Rik  | ISOM   | 4.74   | 6.83E-09 | NS |
| Tnfaip3       | OSOM   | 2.45   | 6.94E-09 | NS |
| 0610040J01Rik | Glom   | 2.88   | 7.02E-09 | NS |
| Ttll12        | OSOM   | 2.32   | 7.03E-09 | NS |
| Cyb561        | ISOM   | 2.23   | 7.1E-09  | NS |
| C5ar1         | OSOM   | 6.00   | 7.37E-09 | NS |
| Pkmyt1        | OSOM   | 5.82   | 7.44E-09 | NS |
| Zfp3611       | OSOM   | 4.23   | 7.46E-09 | NS |
| Naa25         | Cortex | 2.40   | 7.46E-09 | NS |
| Parp3         | ISOM   | 2.28   | 7.5E-09  | NS |
| Sh2d4b        | OSOM   | 5.95   | 7.53E-09 | NS |
| Dusp10        | OSOM   | 6.19   | 7.69E-09 | NS |
| Ece2          | OSOM   | 3.17   | 7.82E-09 | NS |
| 1110008P14Rik | ISOM   | 2.64   | 7.88E-09 | NS |
| Samd5         | OSOM   | 16.62  | 7.97E-09 | NS |
| Rgs2          | OSOM   | 5.14   | 8.19E-09 | NS |
| Nol10         | OSOM   | 2.14   | 8.41E-09 | NS |
| Rrm1          | OSOM   | 2.61   | 8.53E-09 | NS |
| Kpnb1         | OSOM   | 2.14   | 8.67E-09 | NS |
| Cdk2          | OSOM   | 2.17   | 8.7E-09  | NS |
| Gjb3          | OSOM   | 40.86  | 9.38E-09 | NS |
| Hyou1         | ISOM   | 2.33   | 9.47E-09 | NS |
| Junb          | OSOM   | 10.02  | 9.63E-09 | NS |
| Bcl3          | OSOM   | 6.93   | 9.81E-09 | NS |
| Sertad4       | OSOM   | 3.30   | 9.84E-09 | NS |
| Csf3r         | OSOM   | 23.95  | 1.14E-08 | NS |
| Alg8          | OSOM   | 2.41   | 1.16E-08 | NS |
| Tacc2         | OSOM   | 3.41   | 1.16E-08 | NS |
| 1300014I06Rik | OSOM   | 3.01   | 1.16E-08 | NS |
| Anxa5         | OSOM   | 2.25   | 1.16E-08 | NS |
| Large         | OSOM   | 2.18   | 1.17E-08 | NS |
| Rnd3          | OSOM   | 2.57   | 1.18E-08 | NS |
| Dap           | OSOM   | 2.43   | 1.21E-08 | NS |
| Tfpi2         | OSOM   | 4.74   | 1.23E-08 | NS |
| Uck2          | OSOM   | 2.52   | 1.36E-08 | NS |
| Sh3bp2        | ISOM   | 4.74   | 1.39E-08 | NS |
| Zdhhc18       | OSOM   | 2.19   | 1.44E-08 | NS |
| Llg1          | OSOM   | 2.00   | 1.51E-08 | NS |
| D430020J02Rik | OSOM   | 9.40   | 1.51E-08 | NS |
| Atf5          | OSOM   | 3.20   | 1.52E-08 | NS |
| Adora1        | OSOM   | 3.97   | 1.57E-08 | NS |
| Sifn4         | OSOM   | 24.35  | 1.57E-08 | NS |
| Tifa          | Cortex | 3.27   | 1.58E-08 | NS |
| Ckap4         | OSOM   | 2.95   | 1.59E-08 | NS |
| Atf3          | OSOM   | 29.77  | 1.65E-08 | NS |
| Arrdc4        | OSOM   | 3.37   | 1.65E-08 | NS |
| Panx1         | OSOM   | 4.66   | 1.75E-08 | NS |
| Fchsd1        | OSOM   | 3.43   | 1.76E-08 | NS |
| Igf2bp2       | OSOM   | 5.83   | 1.8E-08  | NS |
| Zmynd19       | OSOM   | 2.19   | 1.81E-08 | NS |
| Nop2          | OSOM   | 2.11   | 1.81E-08 | NS |
| Nudcd1        | OSOM   | 2.34   | 1.85E-08 | NS |
| Mal2          | OSOM   | 2.86   | 1.87E-08 | NS |
| Ddit3         | OSOM   | 2.96   | 1.89E-08 | NS |
| Ibtk          | OSOM   | 2.13   | 1.91E-08 | NS |
| Ezh2          | OSOM   | 3.05   | 1.94E-08 | NS |
| Limk1         | OSOM   | 2.81   | 1.96E-08 | NS |
| Tirap         | OSOM   | 2.95   | 1.97E-08 | NS |
| Spry2         | OSOM   | 2.59   | 2E-08    | NS |
| Bicap         | OSOM   | 2.05   | 2.02E-08 | NS |
| Coro1c        | OSOM   | 2.19   | 2.04E-08 | NS |
| Mchr1         | OSOM   | 23.77  | 2.05E-08 | NS |
| Sgtb          | OSOM   | 3.72   | 2.05E-08 | NS |
| Chaf1b        | OSOM   | 6.41   | 2.05E-08 | NS |
| Pabpc4        | OSOM   | 2.22   | 2.06E-08 | NS |
| Gmppb         | ISOM   | 2.16   | 2.1E-08  | NS |
| Hspb6         | Cortex | 3.18   | 2.11E-08 | NS |
| Pola1         | OSOM   | 3.31   | 2.12E-08 | NS |
| S100a10       | Cortex | 3.54   | 2.17E-08 | NS |
| Srm           | OSOM   | 2.58   | 2.18E-08 | NS |
| Ppp2r5b       | OSOM   | 2.06   | 2.19E-08 | NS |
| Gja5          | OSOM   | 2.79   | 2.2E-08  | NS |
| Vars          | OSOM   | 2.38   | 2.27E-08 | NS |
| Pdia6         | ISOM   | 2.02   | 2.35E-08 | NS |
| Gemin6        | OSOM   | 2.41   | 2.39E-08 | NS |
| S100a8        | OSOM   | 108.44 | 2.41E-08 | NS |
| 2010109K11Rik | OSOM   | 3.20   | 2.59E-08 | NS |
| Nek6          | Cortex | 3.72   | 2.76E-08 | NS |

|               |        |        |          |    |  |
|---------------|--------|--------|----------|----|--|
| Ccdc149       | OSOM   | 2.57   | 2.85E-08 | NS |  |
| Mab21i3       | OSOM   | 6.07   | 2.86E-08 | NS |  |
| Pak1          | OSOM   | 2.24   | 2.86E-08 | NS |  |
| Brca1         | OSOM   | 8.79   | 2.88E-08 | NS |  |
| Wisp1         | OSOM   | 3.96   | 2.89E-08 | NS |  |
| Crif1         | OSOM   | 54.90  | 2.92E-08 | NS |  |
| Figl1         | OSOM   | 13.36  | 3.1E-08  | NS |  |
| Ccne1         | OSOM   | 8.77   | 3.14E-08 | NS |  |
| 1700017B05Rik | OSOM   | 2.23   | 3.15E-08 | NS |  |
| Jun           | OSOM   | 4.38   | 3.16E-08 | NS |  |
| 2610034B18Rik | OSOM   | 2.10   | 3.22E-08 | NS |  |
| Zdhhc13       | OSOM   | 2.07   | 3.26E-08 | NS |  |
| Dusp4         | OSOM   | 4.18   | 3.29E-08 | NS |  |
| Cars          | OSOM   | 2.34   | 3.33E-08 | NS |  |
| Haus6         | OSOM   | 2.76   | 3.37E-08 | NS |  |
| Nras          | OSOM   | 2.29   | 3.4E-08  | NS |  |
| Col18a1       | OSOM   | 2.82   | 3.48E-08 | NS |  |
| Actn1         | OSOM   | 3.45   | 3.49E-08 | NS |  |
| Tspan8        | OSOM   | 2.67   | 3.56E-08 | NS |  |
| Ctnn          | ISOM   | 2.09   | 3.6E-08  | NS |  |
| Gstcd         | Cortex | 2.75   | 3.71E-08 | NS |  |
| Lrrc20        | OSOM   | 3.24   | 3.72E-08 | NS |  |
| 6330406I15Rik | OSOM   | 12.26  | 4.04E-08 | NS |  |
| Mphosph6      | OSOM   | 2.13   | 4.04E-08 | NS |  |
| D430041D05Rik | Cortex | 201.92 | 4.08E-08 | NS |  |
| Iars          | OSOM   | 2.19   | 4.11E-08 | NS |  |
| Rpp25         | OSOM   | 8.85   | 4.15E-08 | NS |  |
| Gjb4          | OSOM   | 47.18  | 4.16E-08 | NS |  |
| Pycr1         | ISOM   | 7.33   | 4.18E-08 | NS |  |
| Arhgef40      | OSOM   | 2.09   | 4.31E-08 | NS |  |
| Isyna1        | OSOM   | 2.25   | 4.51E-08 | NS |  |
| Hap1          | OSOM   | 2.70   | 4.54E-08 | NS |  |
| Fam83c        | OSOM   | 28.04  | 4.63E-08 | NS |  |
| Ntf5          | Glom   | 9.54   | 4.79E-08 | NS |  |
| Mmp19         | OSOM   | 8.46   | 4.97E-08 | NS |  |
| Rhbdl2        | OSOM   | 6.41   | 5.1E-08  | NS |  |
| Fst           | OSOM   | 6.25   | 5.21E-08 | NS |  |
| Fam111a       | OSOM   | 3.18   | 5.23E-08 | NS |  |
| Chi3i3        | ISOM   | 205.92 | 5.29E-08 | NS |  |
| Uchl3         | OSOM   | 2.55   | 5.36E-08 | NS |  |
| Frk           | OSOM   | 2.55   | 5.56E-08 | NS |  |
| Net1          | ISOM   | 4.11   | 5.56E-08 | NS |  |
| D630045M09Rik | OSOM   | 3.76   | 5.71E-08 | NS |  |
| Tcof1         | OSOM   | 2.24   | 5.94E-08 | NS |  |
| Ostc          | OSOM   | 2.24   | 5.97E-08 | NS |  |
| Topbp1        | OSOM   | 2.04   | 6.07E-08 | NS |  |
| Specc1        | OSOM   | 2.14   | 6.16E-08 | NS |  |
| Ube2cbp       | OSOM   | 2.88   | 6.3E-08  | NS |  |
| Nolc1         | OSOM   | 2.10   | 6.37E-08 | NS |  |
| Rab11fip5     | OSOM   | 2.17   | 6.45E-08 | NS |  |
| Arg2          | Cortex | 3.91   | 6.6E-08  | NS |  |
| Ksr1          | OSOM   | 3.07   | 6.67E-08 | NS |  |
| Aldh1a2       | Cortex | 5.75   | 6.9E-08  | NS |  |
| Ier5l         | OSOM   | 3.76   | 6.91E-08 | NS |  |
| Il13ra1       | ISOM   | 2.29   | 6.96E-08 | NS |  |
| Ercc6l        | OSOM   | 16.12  | 7.08E-08 | NS |  |
| Rgs16         | OSOM   | 10.81  | 7.2E-08  | NS |  |
| Stx11         | OSOM   | 3.71   | 7.41E-08 | NS |  |
| Slc26a1       | ISOM   | 9.04   | 7.81E-08 | NS |  |
| Zbtb42        | OSOM   | 2.54   | 7.95E-08 | NS |  |
| Ch25h         | Cortex | 5.43   | 8.38E-08 | NS |  |
| Bdkrb2        | OSOM   | 96.29  | 8.59E-08 | NS |  |
| Serpinb9      | OSOM   | 2.40   | 8.61E-08 | NS |  |
| Cep78         | OSOM   | 2.72   | 8.81E-08 | NS |  |
| Prkx          | OSOM   | 2.80   | 8.99E-08 | NS |  |
| Cerkl         | OSOM   | 10.73  | 9E-08    | NS |  |
| Unc13b        | OSOM   | 2.33   | 9.13E-08 | NS |  |
| Camkk2        | ISOM   | 2.06   | 9.7E-08  | NS |  |
| Itga5         | OSOM   | 3.23   | 1.02E-07 | NS |  |
| Mcam          | OSOM   | 2.49   | 1.05E-07 | NS |  |
| H6pd          | OSOM   | 2.61   | 1.07E-07 | NS |  |
| Klrg2         | OSOM   | 5.31   | 1.08E-07 | NS |  |
| Gsta1         | Cortex | 42.19  | 1.09E-07 | NS |  |
| Wdhd1         | OSOM   | 5.08   | 1.12E-07 | NS |  |
| Asf1b         | OSOM   | 7.70   | 1.13E-07 | NS |  |
| Uppt          | Cortex | 10.97  | 1.15E-07 | NS |  |
| Hk2           | OSOM   | 17.59  | 1.21E-07 | NS |  |
| Steap2        | OSOM   | 2.63   | 1.21E-07 | NS |  |
| Fut1          | ISOM   | 53.67  | 1.23E-07 | NS |  |
| Gpr153        | OSOM   | 2.87   | 1.3E-07  | NS |  |
| St14          | OSOM   | 2.13   | 1.31E-07 | NS |  |
| Anp32b        | OSOM   | 2.01   | 1.32E-07 | NS |  |
| Slc7a11       | OSOM   | 12.59  | 1.34E-07 | NS |  |
| BC052040      | OSOM   | 2.72   | 1.4E-07  | NS |  |

|               |        |         |          |    |  |
|---------------|--------|---------|----------|----|--|
| Slc35e4       | OSOM   | 2.41    | 1.47E-07 | NS |  |
| Klf5          | OSOM   | 7.43    | 1.49E-07 | NS |  |
| Slc39a14      | ISOM   | 2.33    | 1.51E-07 | NS |  |
| Apobr         | OSOM   | 3.34    | 1.54E-07 | NS |  |
| Ecscr         | OSOM   | 2.84    | 1.58E-07 | NS |  |
| Rcn1          | OSOM   | 2.77    | 1.6E-07  | NS |  |
| Lpin3         | OSOM   | 2.27    | 1.61E-07 | NS |  |
| Fut2          | OSOM   | 92.48   | 1.64E-07 | NS |  |
| Eml2          | OSOM   | 2.05    | 1.64E-07 | NS |  |
| Sh3bgrl2      | OSOM   | 2.18    | 1.65E-07 | NS |  |
| Shq1          | OSOM   | 2.26    | 1.67E-07 | NS |  |
| Ppap2c        | ISOM   | 2.05    | 1.71E-07 | NS |  |
| Egr2          | OSOM   | 38.53   | 1.79E-07 | NS |  |
| Cadm1         | OSOM   | 2.82    | 1.79E-07 | NS |  |
| Grp           | ISOM   | 3067.67 | 1.82E-07 | NS |  |
| Rnd1          | OSOM   | 7.21    | 1.83E-07 | NS |  |
| Cyp4f16       | OSOM   | 2.08    | 1.87E-07 | NS |  |
| Gc            | OSOM   | 8.26    | 1.87E-07 | NS |  |
| Fjx1          | OSOM   | 3.71    | 1.88E-07 | NS |  |
| Adamts1       | Cortex | 4.70    | 1.9E-07  | NS |  |
| Rrm2          | OSOM   | 8.22    | 1.93E-07 | NS |  |
| Mybpc2        | OSOM   | 11.70   | 1.95E-07 | NS |  |
| Mettl2        | OSOM   | 2.07    | 1.96E-07 | NS |  |
| Fam38a        | Cortex | 2.59    | 1.97E-07 | NS |  |
| Efna5         | OSOM   | 2.55    | 1.97E-07 | NS |  |
| Ptprj         | OSOM   | 2.22    | 1.97E-07 | NS |  |
| Map3k2        | OSOM   | 2.00    | 2.01E-07 | NS |  |
| Marveld3      | Glom   | 2.77    | 2.02E-07 | NS |  |
| Mapk7         | OSOM   | 2.34    | 2.06E-07 | NS |  |
| Tgif1         | OSOM   | 4.20    | 2.08E-07 | NS |  |
| Sema6b        | Cortex | 3.03    | 2.12E-07 | NS |  |
| Smyd5         | OSOM   | 2.64    | 2.13E-07 | NS |  |
| Sprr2f        | Cortex | 2862.73 | 2.16E-07 | NS |  |
| D730005E14Rik | OSOM   | 6.39    | 2.16E-07 | NS |  |
| Ipo7          | Cortex | 2.89    | 2.18E-07 | NS |  |
| Mapkapk2      | Cortex | 2.25    | 2.31E-07 | NS |  |
| Mospd2        | Cortex | 2.79    | 2.33E-07 | NS |  |
| Nxn1          | Glom   | 106.33  | 2.4E-07  | NS |  |
| Baz1a         | OSOM   | 2.56    | 2.41E-07 | NS |  |
| Itpr3         | OSOM   | 3.47    | 2.46E-07 | NS |  |
| Sox4          | Cortex | 5.42    | 2.53E-07 | NS |  |
| Mthfd1        | OSOM   | 4.36    | 2.57E-07 | NS |  |
| Paqr5         | Glom   | 2.36    | 2.66E-07 | NS |  |
| Tyro3         | ISOM   | 2.50    | 2.66E-07 | NS |  |
| Uchl4         | OSOM   | 2.42    | 2.71E-07 | NS |  |
| Fkbp11        | OSOM   | 5.30    | 2.71E-07 | NS |  |
| Ii6           | Cortex | 468.98  | 2.73E-07 | NS |  |
| Spsb1         | OSOM   | 5.22    | 2.75E-07 | NS |  |
| Hkdc1         | OSOM   | 9.89    | 2.84E-07 | NS |  |
| Dclk1         | OSOM   | 6.51    | 2.9E-07  | NS |  |
| Trem1         | OSOM   | 47.02   | 2.9E-07  | NS |  |
| Ttc37         | Cortex | 2.73    | 2.97E-07 | NS |  |
| Agt           | Glom   | 5.96    | 3.01E-07 | NS |  |
| Clic1         | OSOM   | 2.33    | 3.03E-07 | NS |  |
| Rbpms         | OSOM   | 2.13    | 3.06E-07 | NS |  |
| Ugt1a9        | Cortex | 20.03   | 3.07E-07 | NS |  |
| Tjp2          | Cortex | 2.20    | 3.14E-07 | NS |  |
| Mkl1          | OSOM   | 2.18    | 3.24E-07 | NS |  |
| Mbnl3         | OSOM   | 2.38    | 3.26E-07 | NS |  |
| Dapp1         | OSOM   | 3.00    | 3.28E-07 | NS |  |
| Rab20         | Glom   | 2.17    | 3.35E-07 | NS |  |
| Vcl           | OSOM   | 2.40    | 3.4E-07  | NS |  |
| Odc1          | ISOM   | 2.50    | 3.49E-07 | NS |  |
| Wfdc2         | ISOM   | 2.46    | 3.51E-07 | NS |  |
| Myd88         | OSOM   | 2.24    | 3.54E-07 | NS |  |
| Mmp9          | OSOM   | 18.54   | 3.56E-07 | NS |  |
| Fhdc1         | OSOM   | 3.52    | 3.6E-07  | NS |  |
| Slc26a9       | OSOM   | 368.73  | 3.63E-07 | NS |  |
| Rhbdf2        | OSOM   | 2.51    | 3.65E-07 | NS |  |
| Ell2          | OSOM   | 2.20    | 3.66E-07 | NS |  |
| Lzic          | OSOM   | 2.10    | 3.79E-07 | NS |  |
| G330512M04Rik | OSOM   | 10.61   | 3.8E-07  | NS |  |
| Slc6a9        | Cortex | 2.39    | 4.05E-07 | NS |  |
| Ppp1r15a      | OSOM   | 2.63    | 4.06E-07 | NS |  |
| Elf3          | Glom   | 3.61    | 4.25E-07 | NS |  |
| Ugt1a10       | Glom   | 397.97  | 4.28E-07 | NS |  |
| Gpt2          | OSOM   | 2.63    | 4.32E-07 | NS |  |
| Nt5dc3        | OSOM   | 2.80    | 4.35E-07 | NS |  |
| Slc15a3       | OSOM   | 3.13    | 4.45E-07 | NS |  |
| 5430427O19Rik | Glom   | 15.89   | 4.52E-07 | NS |  |
| G530011O06Rik | Glom   | 12.16   | 4.6E-07  | NS |  |
| Prim1         | OSOM   | 2.56    | 4.6E-07  | NS |  |
| Mapk4         | ISOM   | 4.57    | 4.66E-07 | NS |  |
| Akap12        | OSOM   | 3.89    | 4.68E-07 | NS |  |

|               |        |        |          |    |  |
|---------------|--------|--------|----------|----|--|
| Nle1          | OSOM   | 2.79   | 4.73E-07 | NS |  |
| Flna          | OSOM   | 2.99   | 4.78E-07 | NS |  |
| Tmem59l       | OSOM   | 278.61 | 4.9E-07  | NS |  |
| Ears2         | ISOM   | 2.03   | 4.93E-07 | NS |  |
| Myo3b         | OSOM   | 3.27   | 5.05E-07 | NS |  |
| Orc1          | OSOM   | 8.59   | 5.13E-07 | NS |  |
| Ung           | OSOM   | 4.95   | 5.14E-07 | NS |  |
| 3110082117Rik | ISOM   | 2.77   | 5.24E-07 | NS |  |
| Gm3776        | OSOM   | 452.45 | 5.25E-07 | NS |  |
| Ccdc86        | OSOM   | 2.33   | 5.32E-07 | NS |  |
| Suv39h1       | OSOM   | 2.14   | 5.5E-07  | NS |  |
| Wrb           | OSOM   | 2.05   | 5.5E-07  | NS |  |
| Nipal1        | OSOM   | 4.14   | 5.52E-07 | NS |  |
| Cldn14        | Glom   | 789.82 | 5.57E-07 | NS |  |
| Mapk6         | Cortex | 2.46   | 5.67E-07 | NS |  |
| Gpatch4       | OSOM   | 2.73   | 5.7E-07  | NS |  |
| Nasp          | OSOM   | 2.11   | 5.79E-07 | NS |  |
| Mdfi          | OSOM   | 8.36   | 5.97E-07 | NS |  |
| Map3k1        | OSOM   | 2.77   | 6.09E-07 | NS |  |
| Gstp1         | Cortex | 2.16   | 6.1E-07  | NS |  |
| Ccdc120       | OSOM   | 2.40   | 6.22E-07 | NS |  |
| Esy1          | OSOM   | 2.25   | 6.46E-07 | NS |  |
| Sec24d        | OSOM   | 2.20   | 6.59E-07 | NS |  |
| Fgr           | ISOM   | 5.88   | 6.61E-07 | NS |  |
| Gla           | OSOM   | 2.25   | 7.02E-07 | NS |  |
| Tub           | OSOM   | 16.72  | 7.06E-07 | NS |  |
| Crc1          | OSOM   | 416.52 | 7.11E-07 | NS |  |
| Rfc3          | OSOM   | 2.82   | 7.22E-07 | NS |  |
| Has1          | OSOM   | 108.53 | 7.31E-07 | NS |  |
| Ppan          | OSOM   | 2.73   | 7.39E-07 | NS |  |
| Ncappg2       | OSOM   | 3.83   | 7.68E-07 | NS |  |
| Lrrc8e        | OSOM   | 2.98   | 7.74E-07 | NS |  |
| Icam1         | Cortex | 2.54   | 7.78E-07 | NS |  |
| Wasf1         | OSOM   | 2.73   | 7.83E-07 | NS |  |
| Stil          | OSOM   | 8.15   | 8.08E-07 | NS |  |
| Nln           | OSOM   | 2.25   | 8.19E-07 | NS |  |
| Serp1b1a      | ISOM   | 4.95   | 8.27E-07 | NS |  |
| Itga6         | ISOM   | 4.92   | 8.39E-07 | NS |  |
| Aldh1a1       | Cortex | 3.10   | 8.4E-07  | NS |  |
| Plekho1       | OSOM   | 2.36   | 8.49E-07 | NS |  |
| Gm10845       | Glom   | 108.06 | 8.6E-07  | NS |  |
| Trf           | OSOM   | 7.08   | 8.7E-07  | NS |  |
| Pmepa1        | OSOM   | 2.15   | 8.83E-07 | NS |  |
| 9930005F22Rik | OSOM   | 7.07   | 8.94E-07 | NS |  |
| Bcl6          | OSOM   | 3.11   | 9.47E-07 | NS |  |
| Dph2          | OSOM   | 2.10   | 9.7E-07  | NS |  |
| Trp53         | OSOM   | 2.32   | 9.85E-07 | NS |  |
| Erap1         | Cortex | 2.05   | 9.9E-07  | NS |  |
| Vps37b        | OSOM   | 2.15   | 9.91E-07 | NS |  |
| Pus7l         | OSOM   | 2.98   | 9.92E-07 | NS |  |
| Serp2         | OSOM   | 6.93   | 9.99E-07 | NS |  |
| Fgf21         | OSOM   | 126.26 | 1.01E-06 | NS |  |
| Itpkc         | OSOM   | 2.35   | 1.03E-06 | NS |  |
| Myo9b         | OSOM   | 2.13   | 1.05E-06 | NS |  |
| Fam84b        | OSOM   | 2.13   | 1.08E-06 | NS |  |
| St6gal1       | OSOM   | 2.14   | 1.09E-06 | NS |  |
| Glrx          | OSOM   | 2.19   | 1.13E-06 | NS |  |
| Me2           | ISOM   | 2.01   | 1.14E-06 | NS |  |
| Ascc3         | Cortex | 2.17   | 1.17E-06 | NS |  |
| Pros1         | OSOM   | 2.03   | 1.18E-06 | NS |  |
| Fam185a       | OSOM   | 2.16   | 1.18E-06 | NS |  |
| Ttll7         | OSOM   | 3.06   | 1.19E-06 | NS |  |
| Snhg5         | OSOM   | 3.62   | 1.19E-06 | NS |  |
| Cxcr2         | OSOM   | 87.56  | 1.23E-06 | NS |  |
| Samd4         | OSOM   | 2.83   | 1.24E-06 | NS |  |
| Gm5506        | Cortex | 2.53   | 1.25E-06 | NS |  |
| Gbe1          | Cortex | 2.33   | 1.27E-06 | NS |  |
| E030011005Rik | OSOM   | 9.11   | 1.29E-06 | NS |  |
| Tipin         | OSOM   | 2.34   | 1.32E-06 | NS |  |
| Adss          | OSOM   | 2.08   | 1.33E-06 | NS |  |
| Mrps18b       | Glom   | 2.34   | 1.34E-06 | NS |  |
| Gfpt1         | ISOM   | 2.04   | 1.35E-06 | NS |  |
| Al414108      | OSOM   | 3.58   | 1.35E-06 | NS |  |
| Asb4          | OSOM   | 6.75   | 1.36E-06 | NS |  |
| 2010003K11Rik | Glom   | 18.90  | 1.36E-06 | NS |  |
| 1810029B16Rik | OSOM   | 2.70   | 1.38E-06 | NS |  |
| Sh3pxd2b      | OSOM   | 2.94   | 1.38E-06 | NS |  |
| Ppp1r9b       | OSOM   | 2.02   | 1.39E-06 | NS |  |
| Cd300lf       | OSOM   | 71.88  | 1.4E-06  | NS |  |
| Grhl2         | Glom   | 2.73   | 1.43E-06 | NS |  |
| Gm13889       | OSOM   | 2.65   | 1.44E-06 | NS |  |
| Tgm2          | OSOM   | 2.64   | 1.46E-06 | NS |  |
| Ccl2          | OSOM   | 11.42  | 1.48E-06 | NS |  |
| Sdf211        | ISOM   | 3.58   | 1.48E-06 | NS |  |

|               |        |        |          |    |  |
|---------------|--------|--------|----------|----|--|
| Fbxo2         | OSOM   | 3.71   | 1.49E-06 | NS |  |
| Mmp24         | OSOM   | 225.84 | 1.53E-06 | NS |  |
| Tbc1d9        | OSOM   | 2.18   | 1.56E-06 | NS |  |
| Gstm5         | Glom   | 3.24   | 1.58E-06 | NS |  |
| Hpgds         | OSOM   | 4.06   | 1.59E-06 | NS |  |
| Ogg1          | OSOM   | 2.11   | 1.62E-06 | NS |  |
| Lmnb1         | OSOM   | 2.98   | 1.66E-06 | NS |  |
| 1300002K09Rik | Glom   | 8.81   | 1.67E-06 | NS |  |
| Cdca7         | OSOM   | 6.93   | 1.67E-06 | NS |  |
| 4930579G22Rik | Glom   | 17.52  | 1.68E-06 | NS |  |
| Sntg2         | Glom   | 17.92  | 1.72E-06 | NS |  |
| Fgfbp1        | Glom   | 3.44   | 1.75E-06 | NS |  |
| Spred3        | OSOM   | 7.86   | 1.77E-06 | NS |  |
| Akr1c13       | OSOM   | 3.32   | 1.82E-06 | NS |  |
| Lsm11         | OSOM   | 2.28   | 1.83E-06 | NS |  |
| Pof1b         | Glom   | 93.31  | 1.83E-06 | NS |  |
| Muc4          | OSOM   | 31.36  | 1.88E-06 | NS |  |
| Oasl1         | OSOM   | 3.62   | 1.89E-06 | NS |  |
| Thbs1         | OSOM   | 2.55   | 1.93E-06 | NS |  |
| Fbxw17        | OSOM   | 2.77   | 1.96E-06 | NS |  |
| Zwint         | OSOM   | 2.04   | 1.97E-06 | NS |  |
| Psd4          | OSOM   | 3.76   | 2.04E-06 | NS |  |
| Brsk1         | OSOM   | 3.27   | 2.04E-06 | NS |  |
| Usp43         | OSOM   | 2.30   | 2.05E-06 | NS |  |
| Pfn1          | OSOM   | 2.03   | 2.09E-06 | NS |  |
| Zfp365        | OSOM   | 17.36  | 2.1E-06  | NS |  |
| Ddx10         | OSOM   | 2.02   | 2.13E-06 | NS |  |
| Ttc22         | OSOM   | 2.58   | 2.13E-06 | NS |  |
| Plk3          | OSOM   | 6.22   | 2.14E-06 | NS |  |
| Fblim1        | OSOM   | 2.40   | 2.15E-06 | NS |  |
| Emilin1       | OSOM   | 2.15   | 2.15E-06 | NS |  |
| Cdc6          | OSOM   | 15.31  | 2.19E-06 | NS |  |
| 4930506M07Rik | Cortex | 2.51   | 2.23E-06 | NS |  |
| Sh3bp4        | OSOM   | 2.09   | 2.24E-06 | NS |  |
| Mmp14         | OSOM   | 2.67   | 2.27E-06 | NS |  |
| Dcbld1        | Glom   | 2.02   | 2.28E-06 | NS |  |
| Chek1         | OSOM   | 6.83   | 2.33E-06 | NS |  |
| Ap1s2         | OSOM   | 2.12   | 2.34E-06 | NS |  |
| Elf4          | OSOM   | 2.31   | 2.34E-06 | NS |  |
| Mex3a         | OSOM   | 3.76   | 2.38E-06 | NS |  |
| Nrm           | OSOM   | 3.17   | 2.48E-06 | NS |  |
| Cdc7          | OSOM   | 4.20   | 2.5E-06  | NS |  |
| Pmaip1        | OSOM   | 4.47   | 2.55E-06 | NS |  |
| Pafah1b3      | Glom   | 2.80   | 2.56E-06 | NS |  |
| Tpm2          | OSOM   | 3.19   | 2.69E-06 | NS |  |
| Snhg3         | OSOM   | 2.09   | 2.7E-06  | NS |  |
| B3gnt7        | ISOM   | 2.22   | 2.72E-06 | NS |  |
| Rrp15         | OSOM   | 2.01   | 2.73E-06 | NS |  |
| Adm           | OSOM   | 3.66   | 2.73E-06 | NS |  |
| Ccdc21        | Cortex | 2.11   | 2.82E-06 | NS |  |
| Manf          | OSOM   | 2.14   | 2.86E-06 | NS |  |
| Anln          | OSOM   | 6.59   | 2.93E-06 | NS |  |
| Fhl3          | OSOM   | 4.00   | 2.93E-06 | NS |  |
| AU022252      | Glom   | 2.02   | 2.94E-06 | NS |  |
| Astn2         | ISOM   | 5.16   | 2.98E-06 | NS |  |
| Emx2          | Glom   | 2.20   | 3E-06    | NS |  |
| Vgf           | ISOM   | 805.18 | 3.04E-06 | NS |  |
| Gpr56         | OSOM   | 2.10   | 3.09E-06 | NS |  |
| Atp8b1        | OSOM   | 2.35   | 3.09E-06 | NS |  |
| Ptpn23        | OSOM   | 2.21   | 3.18E-06 | NS |  |
| Fam83g        | OSOM   | 2.56   | 3.2E-06  | NS |  |
| Rem2          | OSOM   | 10.65  | 3.2E-06  | NS |  |
| Nup43         | OSOM   | 2.27   | 3.32E-06 | NS |  |
| Gm1631        | ISOM   | 15.28  | 3.33E-06 | NS |  |
| Sytl2         | Cortex | 2.49   | 3.35E-06 | NS |  |
| Nhp2          | ISOM   | 2.21   | 3.48E-06 | NS |  |
| Ethe1         | ISOM   | 2.19   | 3.5E-06  | NS |  |
| Srd5a1        | ISOM   | 3.65   | 3.5E-06  | NS |  |
| Ier2          | OSOM   | 4.17   | 3.52E-06 | NS |  |
| Styx11        | Glom   | 112.27 | 3.53E-06 | NS |  |
| Dctd          | OSOM   | 3.87   | 3.58E-06 | NS |  |
| Nt5c          | OSOM   | 2.02   | 3.61E-06 | NS |  |
| Diap3         | OSOM   | 10.68  | 3.61E-06 | NS |  |
| Dcaf1212      | Glom   | 157.81 | 3.62E-06 | NS |  |
| Egfr          | OSOM   | 2.23   | 3.71E-06 | NS |  |
| Sh3bgrl3      | OSOM   | 3.70   | 3.73E-06 | NS |  |
| Lgmn          | OSOM   | 2.10   | 3.78E-06 | NS |  |
| BC048355      | ISOM   | 2.84   | 3.84E-06 | NS |  |
| Eps813        | OSOM   | 8.42   | 3.86E-06 | NS |  |
| E2f3          | OSOM   | 2.42   | 3.9E-06  | NS |  |
| Txnrd1        | Cortex | 2.25   | 3.91E-06 | NS |  |
| Gins1         | OSOM   | 4.02   | 3.91E-06 | NS |  |
| Fkbp10        | OSOM   | 2.77   | 4.03E-06 | NS |  |
| Ftsjd1        | OSOM   | 2.38   | 4.06E-06 | NS |  |

|               |        |        |          |    |
|---------------|--------|--------|----------|----|
| Rapgef4       | OSOM   | 2.10   | 4.07E-06 | NS |
| Plek          | OSOM   | 2.70   | 4.11E-06 | NS |
| Pdlim3        | ISOM   | 3.80   | 4.15E-06 | NS |
| Creb5         | OSOM   | 18.97  | 4.29E-06 | NS |
| Ypel2         | OSOM   | 3.28   | 4.31E-06 | NS |
| Pla2g4c       | OSOM   | 9.30   | 4.52E-06 | NS |
| S100a11       | ISOM   | 2.35   | 4.57E-06 | NS |
| Incenp        | OSOM   | 2.69   | 4.58E-06 | NS |
| Dtl           | OSOM   | 16.56  | 4.73E-06 | NS |
| Btbd17        | OSOM   | 252.53 | 4.84E-06 | NS |
| Sorbs2        | OSOM   | 2.25   | 4.87E-06 | NS |
| A130049A11Rik | Glom   | 10.77  | 4.9E-06  | NS |
| Mms22l        | OSOM   | 4.03   | 4.96E-06 | NS |
| Slc16a1       | OSOM   | 5.12   | 4.96E-06 | NS |
| Slpi          | OSOM   | 38.93  | 5.06E-06 | NS |
| Wdr76         | OSOM   | 2.32   | 5.12E-06 | NS |
| Rrp12         | OSOM   | 2.48   | 5.57E-06 | NS |
| Reep4         | OSOM   | 2.03   | 5.62E-06 | NS |
| Actb          | OSOM   | 2.27   | 5.63E-06 | NS |
| 2900008C10Rik | Glom   | 6.01   | 5.67E-06 | NS |
| Lgi2          | OSOM   | 11.59  | 5.81E-06 | NS |
| Cdr2l         | OSOM   | 2.74   | 5.9E-06  | NS |
| Slc5a10       | Glom   | 6.51   | 6.01E-06 | NS |
| Cftr          | OSOM   | 5.05   | 6.02E-06 | NS |
| Tnfrsf18      | OSOM   | 309.22 | 6.07E-06 | NS |
| Sec1          | OSOM   | 10.04  | 6.08E-06 | NS |
| Snrpd1        | OSOM   | 2.03   | 6.1E-06  | NS |
| Hmga2-ps1     | OSOM   | 6.07   | 6.17E-06 | NS |
| Lrrc10b       | OSOM   | 6.09   | 6.26E-06 | NS |
| Sox9          | OSOM   | 19.22  | 6.37E-06 | NS |
| Selp          | OSOM   | 28.55  | 6.46E-06 | NS |
| Accn1         | OSOM   | 10.46  | 6.47E-06 | NS |
| Cxcl16        | OSOM   | 2.04   | 6.53E-06 | NS |
| Spsb4         | Glom   | 2.13   | 6.61E-06 | NS |
| Mrpl52        | OSOM   | 2.05   | 6.65E-06 | NS |
| Xlr3a         | Glom   | 30.87  | 6.71E-06 | NS |
| Suv39h2       | OSOM   | 2.81   | 6.82E-06 | NS |
| Cyr61         | OSOM   | 5.41   | 6.95E-06 | NS |
| Acsbg1        | OSOM   | 12.89  | 6.99E-06 | NS |
| Syt2          | ISOM   | 17.53  | 7.25E-06 | NS |
| Wdr89         | Glom   | 6.49   | 7.28E-06 | NS |
| Map3k14       | Cortex | 2.46   | 7.35E-06 | NS |
| Col5a3        | OSOM   | 7.28   | 7.37E-06 | NS |
| Trip13        | OSOM   | 6.86   | 7.39E-06 | NS |
| Slco4a1       | OSOM   | 4.05   | 7.41E-06 | NS |
| Tuba1a        | OSOM   | 2.60   | 7.49E-06 | NS |
| 4930579G24Rik | OSOM   | 3.34   | 7.57E-06 | NS |
| 4930427A07Rik | OSOM   | 5.21   | 7.66E-06 | NS |
| Slc16a3       | OSOM   | 4.22   | 7.67E-06 | NS |
| Trib1         | OSOM   | 4.35   | 7.72E-06 | NS |
| Adam11        | OSOM   | 4.22   | 7.88E-06 | NS |
| Hpcal4        | ISOM   | 12.48  | 7.88E-06 | NS |
| Shisa4        | ISOM   | 3.40   | 7.97E-06 | NS |
| Birc3         | Cortex | 2.28   | 8.1E-06  | NS |
| Arl4c         | OSOM   | 3.37   | 8.27E-06 | NS |
| Cp            | Cortex | 3.55   | 8.45E-06 | NS |
| Fth1          | ISOM   | 2.26   | 8.51E-06 | NS |
| Mgst1         | Cortex | 2.93   | 8.56E-06 | NS |
| Sema7a        | OSOM   | 2.94   | 8.63E-06 | NS |
| Rhob          | OSOM   | 2.26   | 8.65E-06 | NS |
| Dbf4          | OSOM   | 2.20   | 8.66E-06 | NS |
| Klf4          | OSOM   | 2.34   | 8.7E-06  | NS |
| Spred1        | OSOM   | 2.28   | 8.76E-06 | NS |
| Mum11l        | OSOM   | 2.91   | 8.86E-06 | NS |
| Mrs2          | ISOM   | 2.12   | 8.87E-06 | NS |
| Zswim4        | OSOM   | 2.05   | 8.92E-06 | NS |
| Dck           | OSOM   | 2.64   | 9.04E-06 | NS |
| Ripk3         | OSOM   | 3.29   | 9.28E-06 | NS |
| Pask          | OSOM   | 3.60   | 9.34E-06 | NS |
| Apex1         | ISOM   | 3.00   | 9.36E-06 | NS |
| It2           | OSOM   | 11.39  | 9.42E-06 | NS |
| Smc2          | OSOM   | 2.36   | 9.53E-06 | NS |
| Sec14l2       | OSOM   | 2.65   | 9.59E-06 | NS |
| Ncaph         | OSOM   | 5.28   | 1.01E-05 | NS |
| E130012A19Rik | OSOM   | 2.90   | 1.01E-05 | NS |
| Slc9a3        | OSOM   | 2.77   | 1.02E-05 | NS |
| Hmga2         | OSOM   | 25.70  | 1.04E-05 | NS |
| Pth2r         | OSOM   | 106.10 | 1.05E-05 | NS |
| Dpep2         | OSOM   | 6.30   | 1.05E-05 | NS |
| Prss22        | OSOM   | 44.54  | 1.06E-05 | NS |
| E030010A14Rik | OSOM   | 3.31   | 1.06E-05 | NS |
| 5430407P10Rik | OSOM   | 3.93   | 1.08E-05 | NS |
| Soat2         | OSOM   | 20.24  | 1.12E-05 | NS |
| Tbl1x         | Cortex | 2.66   | 1.12E-05 | NS |

|               |        |        |          |    |  |
|---------------|--------|--------|----------|----|--|
| Emilin2       | OSOM   | 6.30   | 1.13E-05 | NS |  |
| Ctxn1         | OSOM   | 3.59   | 1.13E-05 | NS |  |
| Ccl12         | ISOM   | 11.75  | 1.15E-05 | NS |  |
| Chaf1a        | OSOM   | 3.74   | 1.18E-05 | NS |  |
| Fez1          | Glom   | 9.06   | 1.18E-05 | NS |  |
| Slc16a14      | OSOM   | 13.68  | 1.2E-05  | NS |  |
| Fam129b       | OSOM   | 2.17   | 1.21E-05 | NS |  |
| McpH1         | OSOM   | 2.19   | 1.24E-05 | NS |  |
| Anxa13        | Glom   | 9.10   | 1.25E-05 | NS |  |
| Cdon          | OSOM   | 2.33   | 1.27E-05 | NS |  |
| Abcb1b        | OSOM   | 3.13   | 1.29E-05 | NS |  |
| 2310043J07Rik | OSOM   | 11.34  | 1.3E-05  | NS |  |
| Ptpn5         | OSOM   | 3.94   | 1.31E-05 | NS |  |
| A630055G03Rik | OSOM   | 12.13  | 1.34E-05 | NS |  |
| Abhd2         | Cortex | 2.95   | 1.34E-05 | NS |  |
| Las1l         | OSOM   | 2.85   | 1.35E-05 | NS |  |
| Cyb5r2        | ISOM   | 15.99  | 1.36E-05 | NS |  |
| Cyp4f18       | OSOM   | 4.52   | 1.36E-05 | NS |  |
| Abcc4         | OSOM   | 2.41   | 1.37E-05 | NS |  |
| Chsy3         | OSOM   | 3.44   | 1.37E-05 | NS |  |
| Cdh2          | OSOM   | 3.14   | 1.4E-05  | NS |  |
| Nup1          | OSOM   | 2.19   | 1.4E-05  | NS |  |
| Acot5         | OSOM   | 88.04  | 1.43E-05 | NS |  |
| Mpp6          | Glom   | 2.21   | 1.46E-05 | NS |  |
| Gm14137       | OSOM   | 4.23   | 1.46E-05 | NS |  |
| Mob1a         | Cortex | 2.94   | 1.48E-05 | NS |  |
| Ilf6          | Cortex | 411.20 | 1.52E-05 | NS |  |
| F630110N24Rik | Cortex | 2.61   | 1.52E-05 | NS |  |
| Vps13c        | Cortex | 2.84   | 1.53E-05 | NS |  |
| Lysmd3        | Cortex | 2.37   | 1.53E-05 | NS |  |
| Hmox1         | OSOM   | 6.61   | 1.53E-05 | NS |  |
| Tmcc3         | OSOM   | 2.16   | 1.54E-05 | NS |  |
| Syne2         | Cortex | 2.34   | 1.57E-05 | NS |  |
| Scin          | Glom   | 2.87   | 1.57E-05 | NS |  |
| Snx10         | OSOM   | 3.00   | 1.6E-05  | NS |  |
| Tonsl         | OSOM   | 2.95   | 1.61E-05 | NS |  |
| Plin4         | OSOM   | 6.48   | 1.64E-05 | NS |  |
| Rgs6          | OSOM   | 3.06   | 1.65E-05 | NS |  |
| Bst1          | OSOM   | 2.33   | 1.66E-05 | NS |  |
| Gpr39         | OSOM   | 5.19   | 1.66E-05 | NS |  |
| S100a3        | OSOM   | 47.81  | 1.67E-05 | NS |  |
| Itgb6         | Glom   | 2.95   | 1.74E-05 | NS |  |
| Pi16          | OSOM   | 3.32   | 1.75E-05 | NS |  |
| Sema3f        | OSOM   | 2.14   | 1.8E-05  | NS |  |
| Ces2e         | OSOM   | 2.85   | 1.8E-05  | NS |  |
| Efcab5        | ISOM   | 3.46   | 1.81E-05 | NS |  |
| Pknox1        | Glom   | 6.08   | 1.81E-05 | NS |  |
| Timeless      | OSOM   | 2.37   | 1.84E-05 | NS |  |
| Sesn3         | OSOM   | 2.60   | 1.85E-05 | NS |  |
| PlekHg2       | OSOM   | 2.18   | 1.87E-05 | NS |  |
| Mad2l1        | OSOM   | 2.52   | 1.88E-05 | NS |  |
| Bhlha15       | ISOM   | 6.11   | 1.89E-05 | NS |  |
| Gpbar1        | OSOM   | 39.30  | 1.92E-05 | NS |  |
| Zfp202        | OSOM   | 2.38   | 2E-05    | NS |  |
| D10Bwg1379e   | ISOM   | 4.04   | 2.01E-05 | NS |  |
| Fos           | OSOM   | 29.29  | 2.1E-05  | NS |  |
| Tnfrsf9       | OSOM   | 5.28   | 2.13E-05 | NS |  |
| Catsper3      | Glom   | 89.85  | 2.24E-05 | NS |  |
| Ammecr1       | OSOM   | 3.41   | 2.25E-05 | NS |  |
| Tead4         | OSOM   | 2.70   | 2.28E-05 | NS |  |
| Fhod3         | Glom   | 2.48   | 2.29E-05 | NS |  |
| Sc4mol        | OSOM   | 2.35   | 2.3E-05  | NS |  |
| Gm11974       | OSOM   | 3.83   | 2.31E-05 | NS |  |
| Nfe2          | OSOM   | 23.02  | 2.33E-05 | NS |  |
| Tpbp          | OSOM   | 2.86   | 2.35E-05 | NS |  |
| Mmp7          | Cortex | 57.72  | 2.4E-05  | NS |  |
| Itgb3         | OSOM   | 3.99   | 2.52E-05 | NS |  |
| Adora2b       | Cortex | 4.18   | 2.53E-05 | NS |  |
| Rad51ap1      | OSOM   | 7.47   | 2.53E-05 | NS |  |
| Gtse1         | OSOM   | 6.82   | 2.57E-05 | NS |  |
| Chtf18        | OSOM   | 5.03   | 2.6E-05  | NS |  |
| Grhl1         | OSOM   | 2.50   | 2.61E-05 | NS |  |
| Gm20324       | Glom   | 5.59   | 2.67E-05 | NS |  |
| Lmna          | OSOM   | 2.03   | 2.68E-05 | NS |  |
| Pglyrp1       | OSOM   | 4.93   | 2.74E-05 | NS |  |
| 2010002N04Rik | Glom   | 2.75   | 2.74E-05 | NS |  |
| Osbpl3        | Glom   | 2.01   | 2.75E-05 | NS |  |
| Chi3l1        | Glom   | 5.93   | 2.76E-05 | NS |  |
| Ptger4        | OSOM   | 2.20   | 2.77E-05 | NS |  |
| A330021E22Rik | OSOM   | 2.62   | 2.8E-05  | NS |  |
| Bicc1         | Cortex | 3.09   | 2.8E-05  | NS |  |
| Ptpr          | OSOM   | 2.78   | 2.81E-05 | NS |  |
| Prkar2a       | Cortex | 2.13   | 2.82E-05 | NS |  |
| Plk4          | OSOM   | 2.36   | 2.83E-05 | NS |  |



|               |        |        |          |    |
|---------------|--------|--------|----------|----|
| Hes1          | OSOM   | 2.13   | 2.85E-05 | NS |
| Ccdc103       | Glom   | 4.51   | 2.85E-05 | NS |
| Snora3        | Glom   | 77.44  | 2.9E-05  | NS |
| Prr5l         | OSOM   | 3.00   | 2.91E-05 | NS |
| Arhgap28      | OSOM   | 2.40   | 2.91E-05 | NS |
| Itgb2         | OSOM   | 2.47   | 2.91E-05 | NS |
| Clec4d        | OSOM   | 32.64  | 2.94E-05 | NS |
| Naif1         | Cortex | 2.74   | 2.94E-05 | NS |
| Retnlg        | OSOM   | 112.35 | 2.95E-05 | NS |
| Tagln2        | OSOM   | 2.33   | 2.96E-05 | NS |
| Pilra         | OSOM   | 8.47   | 2.99E-05 | NS |
| Prss23        | Glom   | 2.03   | 3.03E-05 | NS |
| Scx           | OSOM   | 2.95   | 3.07E-05 | NS |
| Gpr35         | OSOM   | 4.30   | 3.08E-05 | NS |
| Pex11c        | Glom   | 2.38   | 3.14E-05 | NS |
| Sgol2         | OSOM   | 5.16   | 3.17E-05 | NS |
| Clec4e        | OSOM   | 164.31 | 3.19E-05 | NS |
| 1810033B17Rik | ISOM   | 37.96  | 3.2E-05  | NS |
| Pir           | Cortex | 2.96   | 3.24E-05 | NS |
| B3gnt3        | OSOM   | 2.28   | 3.24E-05 | NS |
| Slc25a43      | ISOM   | 4.75   | 3.27E-05 | NS |
| Hs3st6        | OSOM   | 4.02   | 3.31E-05 | NS |
| 4833422C13Rik | OSOM   | 5.59   | 3.34E-05 | NS |
| Ctsd          | OSOM   | 2.23   | 3.35E-05 | NS |
| Pgbd5         | Cortex | 6.31   | 3.4E-05  | NS |
| Inhbb         | Cortex | 4.07   | 3.45E-05 | NS |
| Ms4a6d        | OSOM   | 5.73   | 3.47E-05 | NS |
| BC055324      | OSOM   | 3.32   | 3.48E-05 | NS |
| Rad51         | OSOM   | 7.02   | 3.58E-05 | NS |
| Deptor        | Cortex | 4.60   | 3.61E-05 | NS |
| Ociad2        | OSOM   | 2.33   | 3.61E-05 | NS |
| Msr1          | OSOM   | 4.78   | 3.73E-05 | NS |
| Dyrk3         | ISOM   | 3.74   | 3.74E-05 | NS |
| AA467197      | OSOM   | 12.06  | 3.76E-05 | NS |
| 2810417H13Rik | OSOM   | 9.42   | 3.81E-05 | NS |
| Grrp1         | OSOM   | 2.87   | 3.86E-05 | NS |
| Hmga1         | OSOM   | 28.45  | 3.88E-05 | NS |
| Epn3          | OSOM   | 2.01   | 3.91E-05 | NS |
| Tir2          | Cortex | 2.81   | 3.94E-05 | NS |
| Impdh2        | OSOM   | 2.25   | 3.98E-05 | NS |
| Ccdc109b      | OSOM   | 3.41   | 4.06E-05 | NS |
| Slc40a1       | OSOM   | 2.51   | 4.08E-05 | NS |
| Pcsk2         | ISOM   | 29.82  | 4.1E-05  | NS |
| Sqstm1        | OSOM   | 2.09   | 4.19E-05 | NS |
| Unc13d        | OSOM   | 3.26   | 4.2E-05  | NS |
| Nlgn2         | OSOM   | 2.07   | 4.25E-05 | NS |
| Pla2g2e       | OSOM   | 157.11 | 4.27E-05 | NS |
| Nol12         | ISOM   | 2.00   | 4.29E-05 | NS |
| Slc44a3       | OSOM   | 2.02   | 4.33E-05 | NS |
| Gpr84         | OSOM   | 77.41  | 4.35E-05 | NS |
| O3far1        | Glom   | 75.52  | 4.36E-05 | NS |
| Slc41a2       | Glom   | 2.62   | 4.37E-05 | NS |
| Plec          | OSOM   | 2.66   | 4.37E-05 | NS |
| Zfp575        | Glom   | 89.66  | 4.38E-05 | NS |
| Npm3          | OSOM   | 2.11   | 4.43E-05 | NS |
| Slc25a30      | Cortex | 2.57   | 4.62E-05 | NS |
| Dmrt2         | OSOM   | 2.17   | 4.7E-05  | NS |
| 4833417C18Rik | Glom   | 11.28  | 4.71E-05 | NS |
| Stc2          | ISOM   | 3.74   | 4.75E-05 | NS |
| Exo1          | OSOM   | 12.90  | 4.84E-05 | NS |
| Sele          | OSOM   | 13.05  | 4.93E-05 | NS |
| Bcl2a1a       | Glom   | 8.92   | 4.93E-05 | NS |
| Slc22a15      | OSOM   | 2.17   | 4.95E-05 | NS |
| Mfi2          | Glom   | 184.22 | 4.97E-05 | NS |
| Guca2a        | ISOM   | 6.50   | 4.98E-05 | NS |
| Eif2c2        | Cortex | 2.65   | 4.99E-05 | NS |
| Chac1         | OSOM   | 9.05   | 5.03E-05 | NS |
| Tsr1          | OSOM   | 2.03   | 5.04E-05 | NS |
| Mical3        | OSOM   | 3.06   | 5.11E-05 | NS |
| Sh2d5         | OSOM   | 12.19  | 5.15E-05 | NS |
| Pus1          | OSOM   | 2.07   | 5.16E-05 | NS |
| Tcf19         | OSOM   | 3.18   | 5.23E-05 | NS |
| Cldn1         | OSOM   | 3.21   | 5.25E-05 | NS |
| Ptprn         | OSOM   | 18.57  | 5.27E-05 | NS |
| Mpzl2         | Glom   | 2.10   | 5.29E-05 | NS |
| Spata5l1      | OSOM   | 2.39   | 5.32E-05 | NS |
| Wnt7a         | ISOM   | 80.50  | 5.38E-05 | NS |
| Rbm11         | ISOM   | 2.11   | 5.45E-05 | NS |
| Tmem98        | OSOM   | 2.03   | 5.51E-05 | NS |
| Fem1c         | Cortex | 2.09   | 5.51E-05 | NS |
| Tiam2         | OSOM   | 2.10   | 5.51E-05 | NS |
| Thbd          | OSOM   | 2.05   | 5.53E-05 | NS |
| Gm5918        | Glom   | 2.00   | 5.56E-05 | NS |
| 1700034O15Rik | Glom   | 74.15  | 5.57E-05 | NS |

|               |        |        |          |    |  |
|---------------|--------|--------|----------|----|--|
| Col5a1        | OSOM   | 2.55   | 5.58E-05 | NS |  |
| Gm711         | Glom   | 18.98  | 5.59E-05 | NS |  |
| Capn5         | OSOM   | 2.05   | 5.67E-05 | NS |  |
| Capg          | Glom   | 2.32   | 5.68E-05 | NS |  |
| Serpina3m     | OSOM   | 336.54 | 5.72E-05 | NS |  |
| Elfn1         | Glom   | 6.88   | 5.73E-05 | NS |  |
| Cd276         | OSOM   | 5.02   | 5.78E-05 | NS |  |
| Dsp           | OSOM   | 2.21   | 5.78E-05 | NS |  |
| Rfc4          | OSOM   | 2.56   | 5.88E-05 | NS |  |
| Slc19a1       | Glom   | 2.16   | 5.89E-05 | NS |  |
| E2f7          | OSOM   | 5.03   | 5.91E-05 | NS |  |
| Serpina1a     | Glom   | 19.72  | 6.15E-05 | NS |  |
| Gpr77         | OSOM   | 6.70   | 6.24E-05 | NS |  |
| Uba6          | Cortex | 2.49   | 6.3E-05  | NS |  |
| Slc1a2        | Glom   | 12.12  | 6.3E-05  | NS |  |
| 6230409E13Rik | ISOM   | 2.98   | 6.42E-05 | NS |  |
| Dusp6         | OSOM   | 2.31   | 6.52E-05 | NS |  |
| Pole          | OSOM   | 3.96   | 6.54E-05 | NS |  |
| 1520402A15Rik | Glom   | 2.68   | 6.54E-05 | NS |  |
| Pcdhga2       | Glom   | 8.84   | 6.67E-05 | NS |  |
| Fam54a        | OSOM   | 7.05   | 6.7E-05  | NS |  |
| Ccdc112       | OSOM   | 2.04   | 6.75E-05 | NS |  |
| Pdgfa         | OSOM   | 2.18   | 6.9E-05  | NS |  |
| Ilf1f9        | OSOM   | 113.15 | 6.91E-05 | NS |  |
| Ubxn10        | Glom   | 7.15   | 6.92E-05 | NS |  |
| Krt12         | OSOM   | 23.12  | 7.09E-05 | NS |  |
| Ube2u         | Glom   | 5.22   | 7.1E-05  | NS |  |
| Cyp4a12b      | OSOM   | 16.16  | 7.13E-05 | NS |  |
| Phlda3        | OSOM   | 2.26   | 7.13E-05 | NS |  |
| Hcn3          | Glom   | 8.44   | 7.16E-05 | NS |  |
| Rassf8        | Cortex | 3.16   | 7.16E-05 | NS |  |
| Cd109         | Glom   | 3.49   | 7.31E-05 | NS |  |
| Mmp3          | OSOM   | 7.13   | 7.53E-05 | NS |  |
| Met           | Glom   | 2.25   | 7.53E-05 | NS |  |
| Slc5a1        | Glom   | 2.38   | 7.54E-05 | NS |  |
| S1pr2         | OSOM   | 2.09   | 7.67E-05 | NS |  |
| D030028A08Rik | ISOM   | 3.52   | 7.85E-05 | NS |  |
| Tpte          | Glom   | 58.23  | 7.94E-05 | NS |  |
| Acsf2         | Cortex | 2.21   | 7.96E-05 | NS |  |
| Cdca8         | OSOM   | 3.81   | 8.01E-05 | NS |  |
| Gpr176        | OSOM   | 4.02   | 8.03E-05 | NS |  |
| Tlr9          | Glom   | 68.60  | 8.12E-05 | NS |  |
| 2810459M11Rik | OSOM   | 8.83   | 8.18E-05 | NS |  |
| Lpo           | Glom   | 34.61  | 8.36E-05 | NS |  |
| Foxd3         | Glom   | 130.05 | 8.41E-05 | NS |  |
| Irf2          | OSOM   | 7.81   | 8.81E-05 | NS |  |
| Zfp593        | OSOM   | 2.32   | 8.9E-05  | NS |  |
| Mir3091       | OSOM   | 12.80  | 8.94E-05 | NS |  |
| Lypd3         | OSOM   | 6.09   | 8.97E-05 | NS |  |
| Cldn2         | Glom   | 2.90   | 8.97E-05 | NS |  |
| Syce2         | Glom   | 2.74   | 8.97E-05 | NS |  |
| Csf2rb2       | Glom   | 4.39   | 9.06E-05 | NS |  |
| C630004H02Rik | OSOM   | 2.24   | 9.12E-05 | NS |  |
| Usp9x         | Cortex | 2.46   | 9.2E-05  | NS |  |
| Serpina1b     | OSOM   | 12.45  | 9.21E-05 | NS |  |
| Cyp4b1        | OSOM   | 2.66   | 9.25E-05 | NS |  |
| Fcrls         | OSOM   | 5.04   | 9.35E-05 | NS |  |
| H28           | Glom   | 54.39  | 9.35E-05 | NS |  |
| Dpysl3        | Cortex | 4.19   | 9.42E-05 | NS |  |
| Zchhc12       | Glom   | 6.92   | 9.47E-05 | NS |  |
| 4632434I11Rik | OSOM   | 3.58   | 9.56E-05 | NS |  |
| Cxcl17        | OSOM   | 19.24  | 9.56E-05 | NS |  |
| Creb3l3       | Glom   | 229.75 | 9.58E-05 | NS |  |
| Cacng1        | Glom   | 90.76  | 9.59E-05 | NS |  |
| C1q3          | Glom   | 66.72  | 9.72E-05 | NS |  |
| Dbi           | Glom   | 2.58   | 9.78E-05 | NS |  |
| Xk            | OSOM   | 3.34   | 9.82E-05 | NS |  |
| 5430425J12Rik | Glom   | 166.90 | 9.94E-05 | NS |  |
| Ascl4         | Glom   | 59.33  | 9.95E-05 | NS |  |

















**Supplemental Table 4**

| Gene                  | qPCR Primer Sequence |                                   |
|-----------------------|----------------------|-----------------------------------|
| <b><i>Nphs1</i></b>   | Forward              | 5' – GTGTCCAAAGCCATCCAGTT – 3'    |
|                       | Reverse              | 5' – GGCAACCTTTACATCTTGGG – 3'    |
| <b><i>Nphs2</i></b>   | Forward              | 5' – GCGAGGCACTTCGTGAAAC – 3'     |
|                       | Reverse              | 5' – CACTTGCTCTCCCAGGAAC – 3'     |
| <b><i>Wt1</i></b>     | Forward              | 5' – ATCTGAAGACCCACACCAGG – 3'    |
|                       | Reverse              | 5' – TTTCTGACAACCTGTGCCACC – 3'   |
| <b><i>Synpo</i></b>   | Forward              | 5' – GCTCATTGACATGCAGCCTA – 3'    |
|                       | Reverse              | 5' – TCATGGGGCTTTGCTCTATC – 3'    |
| <b><i>Slc5a2</i></b>  | Forward              | 5' – TGAGTGGGAATGCGCTCTTCG – 3'   |
|                       | Reverse              | 5' – CTTGCGGAGGTAAGGAGGC – 3'     |
| <b><i>Alpl</i></b>    | Forward              | 5' – AACCCAGACACAAGCATTCC – 3'    |
|                       | Reverse              | 5' – GCCTTTGAGGTTTTTGGTCA – 3'    |
| <b><i>Pck1</i></b>    | Forward              | 5' – AGCCTTTGGTCAACAACCTGG – 3'   |
|                       | Reverse              | 5' – GTTATGCCAGGATCAGCAT – 3'     |
| <b><i>Lrp2</i></b>    | Forward              | 5' – TCTGGTGGAAATGTGATGGA – 3'    |
|                       | Reverse              | 5' – ACACCGGTGATGTTACAGA – 3'     |
| <b><i>Ggt1</i></b>    | Forward              | 5' – AAAAACGGGACGTCATTGAG – 3'    |
|                       | Reverse              | 5' – CAGCCTCCTGGATGTCTTTC – 3'    |
| <b><i>Umod</i></b>    | Forward              | 5' – GAGATCCAGGTGAAGGCTTG – 3'    |
|                       | Reverse              | 5' – TGCAGTAAGCCAGATTGCAC – 3'    |
| <b><i>Hoxb7</i></b>   | Forward              | 5' – ACCGAGTTCCTTCAACATGC – 3'    |
|                       | Reverse              | 5' – GTCTGGTAGCGCGTGTAGGT – 3'    |
| <b><i>Aqp2</i></b>    | Forward              | 5' – CTGTGGAGCTCTTCCTGACC – 3'    |
|                       | Reverse              | 5' – GGCTACCCAGGTTGTCACTG – 3'    |
| <b><i>Hsd11b2</i></b> | Forward              | 5' – CTGCAGATGGATCTGACCAA – 3'    |
|                       | Reverse              | 5' – GTCAGCTCAAGTGCACCAA – 3'     |
| <b><i>Stc1</i></b>    | Forward              | 5' – ATCCTTCTTGACAGTGCTGCTAA – 3' |
|                       | Reverse              | 5' – CGATGCTGCAAACGTTAAGCT – 3'   |
| <b><i>Pappa2</i></b>  | Forward              | 5' – CAGAGGGAGGACAGAGCAAC – 3'    |
|                       | Reverse              | 5' – GGTCCAAACTGGTCACGACT – 3'    |
| <b><i>Enpp2</i></b>   | Forward              | 5' – TCTAGCATCCCAGAGCACCT – 3'    |
|                       | Reverse              | 5' – CGTTTGAAGGCAGGGTACAT – 3'    |
| <b><i>Hpd</i></b>     | Forward              | 5' – CATTCCACTCGGTGACCTT – 3'     |
|                       | Reverse              | 5' – CTCGAATGCGATGTCTTTCA – 3'    |
| <b><i>Tuba4a</i></b>  | Forward              | 5' – AGTTCCAGACCAACCTGGTG – 3'    |
|                       | Reverse              | 5' – TGACAGCTGCTCATGGTAGG – 3'    |
| <b><i>Impa1</i></b>   | Forward              | 5' – AAGGGAAAGGTGCCTTTTGT – 3'    |
|                       | Reverse              | 5' – GCAGTGGATTCCCATCTCAT – 3'    |
| <b><i>Ddit4l</i></b>  | Forward              | 5' – CCCTGGGAGTCTGCTAAGTG – 3'    |
|                       | Reverse              | 5' – GGTCAGTTTCTCAGGGACCA – 3'    |
| <b><i>Lcn2</i></b>    | Forward              | 5' – CTCAGAACTTGATCCCTGCC – 3'    |
|                       | Reverse              | 5' – TCCTTGAGGCCAGAGACTT – 3'     |
| <b><i>Havcr</i></b>   | Forward              | 5' – CATTAGGCCTCATACTGC – 3'      |
|                       | Reverse              | 5' – ACAAGCAGAAGATGGGCTT – 3'     |
| <b><i>Actb</i></b>    | Forward              | 5' – GGCTGTATTCCCCTCCATCG – 3'    |
|                       | Reverse              | 5' – CCAGTTGGTAACAATGCCATGT – 3'  |
